# Supplementary material for: In SilicoScrutiny of Genes Revealing Phylogenetic Congruence with Clinical Prevalence or Tropism Properties ofChlamydia trachomatisStrains
Source: Oxford University Press journal article supplement (doi:10.1534/g3.114.015354), 2015-01-01
Supplement: 015354_015354si.pdf [file 015354_015354si.pdf]

***In silico scrutiny of genes revealing phylogenetic congruence with clinical prevalence or tropism properties of *Chlamydia trachomatis* strains***

Rita Ferreira \*, Minia Antelo \*, Alexandra Nunes \*,† , Vítor Borges \*,†, Vera Damião \*, Maria José Borrego \*, and João Paulo Gomes \*,†,1

\* Reference Laboratory of Bacterial Sexually Transmitted Infections and § Bioinformatics Unit, Department of Infectious Diseases, National Institute of Health, Av. Padre Cruz, 1649-016 Lisbon, Portugal

† Corresponding author: Department of Infectious Diseases, National Institute of Health, Av. Padre Cruz, 1649-016 Lisbon, Portugal. E-mail address: [j.paulo.gomes@insa.min-saude.pt](mailto:j.paulo.gomes@insa.min-saude.pt)

**DOI: 10.1534/g3.114.015354**

**Table S1** *C. trachomatis* strains used in the present study.

| Strains      | Accession nº. | Isolation location | Reference              |
|--------------|---------------|--------------------|------------------------|
| A/Har13      | CP000051      | Conjunctiva        | Carlson et al. 2005    |
| A/2497       | FM872306      | Ocular             | Harris et al. 2012     |
| A/363        | HE601796      | Ocular             | Harris et al. 2012     |
| A/5291       | HE601810      | Ocular             | Harris et al. 2012     |
| A/7249       | HE601797      | Ocular             | Harris et al. 2012     |
| B/TZ1A828/OT | FM872307      | Ocular             | Seth-Smith et al. 2009 |
| B/Jali20/OT  | FM872308      | Ocular             | Seth-Smith et al. 2009 |
| C/TW-3       | CP006945      | Conjunctiva        | Borges et al. 2014     |
| D/UW-3/CX    | AE001273      | Cervix             | Stephens et al. 1998   |
| D(s)/2923    | ACFJ01000001  | Cervix             | Jeffrey et al. 2010    |
| D/SotonD1    | HE601798      | Endocervix         | Harris et al. 2012     |
| D/SotonD5    | HE601799      | Endocervix         | Harris et al. 2012     |
| D/SotonD6    | HE601800      | Endocervix         | Harris et al. 2012     |
| E/Bour       | HE601870      | Ocular             | Harris et al. 2012     |
| E/SW2        | FN652779      | Urethra            | Unemo et al. 2010      |
| E/SW3        | HE601801      | Cervix             | Harris et al. 2012     |
| E/SotonE4    | HE601802      | Endocervix         | Harris et al. 2012     |
| E/SotonE8    | HE601803      | Endocervix         | Harris et al. 2012     |
| E/11023      | CP001890      | Cervix             | Jeffrey et al. 2010    |
| E/150        | CP001886      | Rectum             | Jeffrey et al. 2010    |
| F/SW4        | HE601804      | Cervix             | Harris et al. 2012     |
| F/SW5        | HE601805      | Cervix             | Harris et al. 2012     |
| F/SotonF3    | HE601806      | Endocervix         | Harris et al. 2012     |
| F(s)/70      | ABYF01000001  | Cervix             | Jeffrey et al. 2010    |
| G/9301       | CP001930      | Urethra            | Jeffrey et al. 2010    |
| G/9768       | CP001887      | Rectum             | Jeffrey et al. 2010    |
| G/11222      | CP001888      | Cervix             | Jeffrey et al. 2010    |
| G/11074      | CP001889      | Rectum             | Jeffrey et al. 2010    |
| G/SotonG1    | HE601807      | Endocervix         | Harris et al. 2012     |
| J/6276       | ABYD01000001  | Cervix             | Jeffrey et al. 2010    |
| Ia/SotonIa1  | HE601808      | Endocervix         | Harris et al. 2012     |
| Ia/SotonIa3  | HE601809      | Endocervix         | Harris et al. 2012     |
| K/SotonK1    | HE601794      | Endocervix         | Harris et al. 2012     |
| L1/440/LN    | HE601950      | Lymph node         | Harris et al. 2012     |
| L1/1322/p2   | HE601951      | Genital ulcer      | Harris et al. 2012     |
| L1/115       | HE601952      | LGV patient        | Harris et al. 2012     |
| L1/224       | HE601953      | LGV patient        | Harris et al. 2012     |
| L2/434/Bu    | AM884176      | Lymph node         | Thomson et al. 2008    |
| L2/25667R    | HE601954      | Rectal biopsy      | Harris et al. 2012     |
| L2b/UCH-1    | AM884177      | Rectum             | Thomson et al. 2008    |
| L2b/8200/07  | HE601795      | Rectum             | Harris et al. 2012     |
| L2b/UCH-2    | HE601956      | Rectum             | Harris et al. 2012     |
| L2b/Canada1  | HE601963      | Rectum             | Harris et al. 2012     |
| L2b/Canada2  | HE601957      | Rectum             | Harris et al. 2012     |
| L2b/LST      | HE601958      | Rectum             | Harris et al. 2012     |
| L2b/CV204    | HE601960      | Rectum             | Harris et al. 2012     |
| L2b/795      | HE601949      | Rectum             | Harris et al. 2012     |
| L2b/Ams1     | HE601959      | Penile ulcer       | Harris et al. 2012     |
| L2b/Ams2     | HE601961      | Anus               | Harris et al. 2012     |
| L2b/Ams3     | HE601962      | Anus               | Harris et al. 2012     |
| L2b/Ams4     | HE601964      | Anus               | Harris et al. 2012     |
| L2b/Ams5     | HE601965      | Anus               | Harris et al. 2012     |
| L3/404/LN    | HE601955      | Lymph node         | Harris et al. 2012     |

**Table S2** Bioinformatical results of all *C. trachomatis* ORFs with detailed information of putative pseudogenes, strains' segregation, overall mean distances and dN/dS values. The genes' annotation corresponds to the D/UW3-CX strain.

Table S2 is available for download as an Excel file at <http://www.g3journal.org/lookup/suppl/doi:10.1534/g3.114.015354/-/DC1>

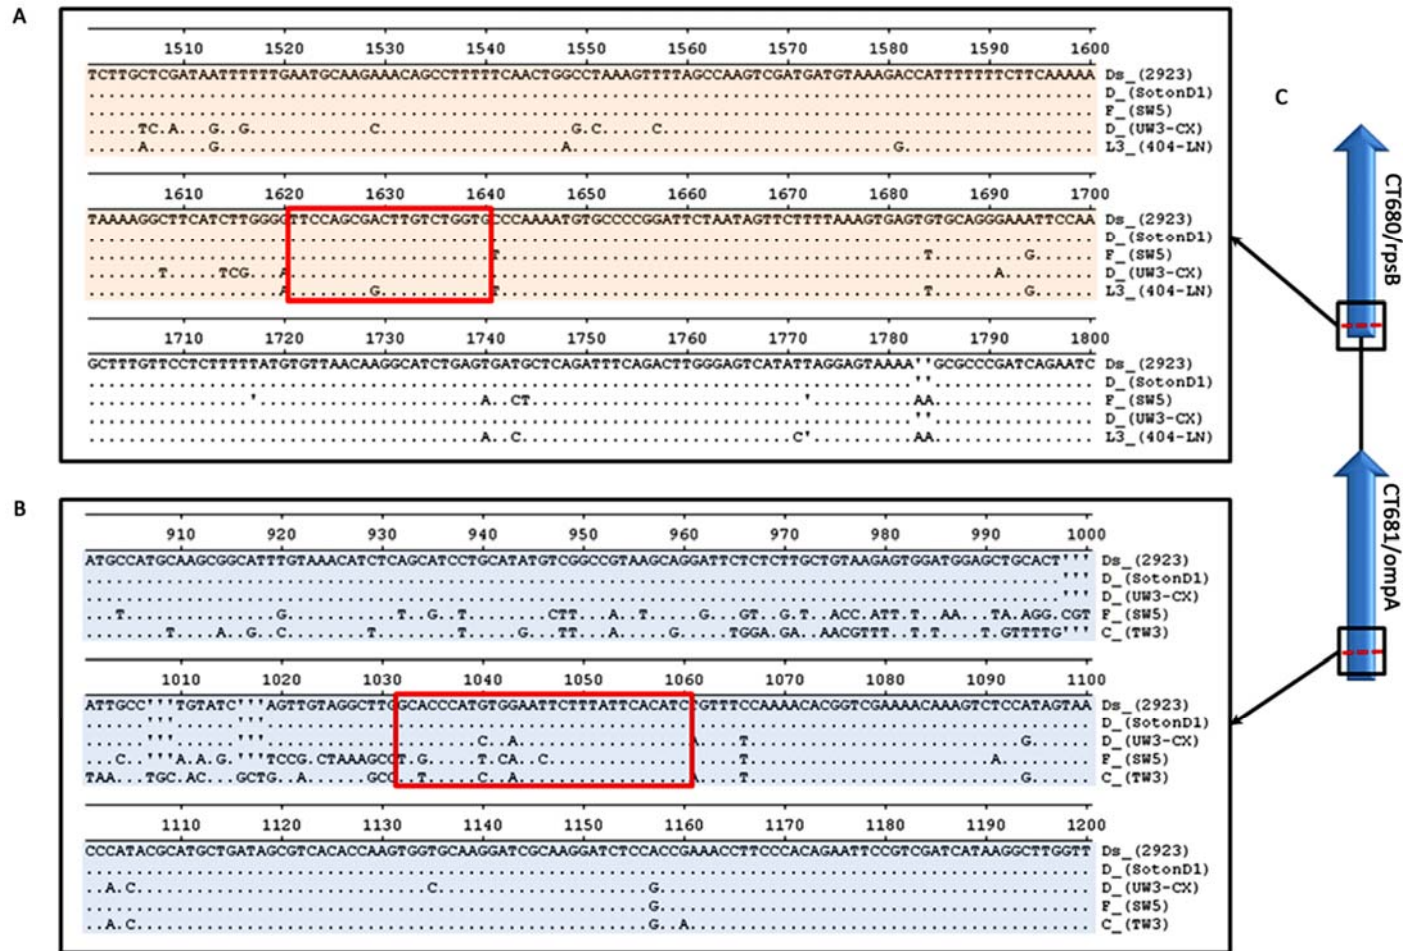

**Figure S1** Nucleotide sequences of crossovers for strains D(s)/2923 and D/SotonD1. Crossover regions (red boxes) are delimited by informative sites from SimPlot/BootScan analysis. Panels A and B represent the partial alignments used for the determination of the crossovers in CT680/*rpsB* and the CT681/*ompA*, respectively. Panel C shows the genetic localization of those partial alignments.

## REFERENCES

- Borges, V., M. Pinheiro, L. Vieira, D. A. Sampaio, A. Nunes, *et al.*, 2014 Complete genome sequence of *Chlamydia trachomatis* ocular serovar C strain TW-3. *Genome Announc.* 2(1). pii:e01204-13. doi:10.1128/genomeA.01204-13.
- Carlson, J.H., S. F. Porcella, G. McClarty, H. D. Caldwell, 2005 Comparative genomic analysis of *Chlamydia trachomatis* oculotropic and genitotropic strains. *Infect. Immun.* 73:6407-6418.
- Harris, S.R., I. N. Clarke, H.M. Seth-Smith, A. W. Solomon, L. T. Cutcliffe, *et al.*, 2012 Whole-genome analysis of diverse *Chlamydia trachomatis* strains identifies phylogenetic relationships masked by current clinical typing. *Nat. Genet.* 44:413-419.
- Jeffrey, B.M., R. J. Suchland, K. L. Quinn, J. R. Davidson, W. E. Stamm, *et al.*, 2010 Genome sequencing of recent clinical *Chlamydia trachomatis* strains identifies loci associated with tissue tropism and regions of apparent recombination. *Infect. Immun.* 78:2544-2553.
- Seth-Smith, H. M., S. R. Harris, K. Persson, P. Marsh, A. Barron, *et al.*, 2009 Co-evolution of genomes and plasmids within *Chlamydia trachomatis* and the emergence in Sweden of a new variant strain. *BMC Genomics.* 10:239. doi:10.1186/1471-2164-10-239.
- Stephens, R.S., S. Kalman, C. Lammel, J. Fan, R. Marathe, *et al.*, 1998 Genome sequence of an obligate intracellular pathogen of humans: *Chlamydia trachomatis*. *Science.* 282:754-759.
- Thomson, N. R., M. T. Holden, C. Carder, N. Lennard, S. J. Lockey, *et al.*, 2008 *Chlamydia trachomatis*: genome sequence analysis of lymphogranuloma venereum isolates. *Genome Res.* 18:161-171.
- Unemo, M., H. M. Seth-Smith, L. T. Cutcliffe, R. J. Skilton, D. Barlow, *et al.*, 2010 The Swedish new variant of *Chlamydia trachomatis*: genome sequence, morphology, cell tropism and phenotypic characterization. *Microbiology* 156:139–1404.
