# Supplementary material for: In SilicoScrutiny of Genes Revealing Phylogenetic Congruence with Clinical Prevalence or Tropism Properties ofChlamydia trachomatisStrains
Source: Oxford University Press journal article supplement (doi:10.1534/g3.114.015354), 2015-01-01
Supplement: 015354_figures1.pdf [file 015354_figures1.pdf]

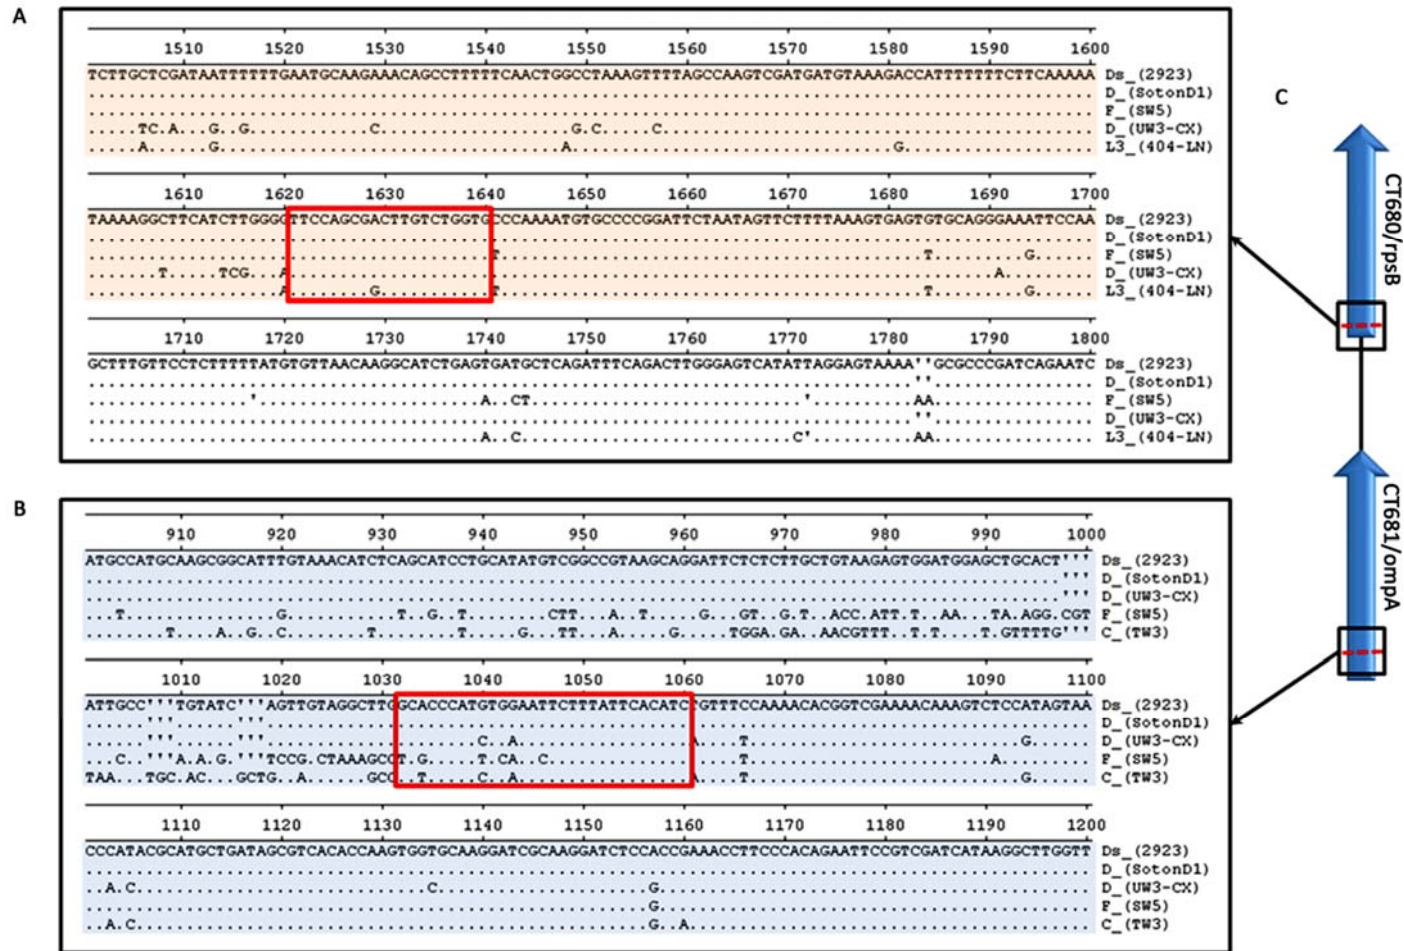

**Figure S1** Nucleotide sequences of crossovers for strains D(s)/2923 and D/SotonD1. Crossover regions (red boxes) are delimited by informative sites from SimPlot/BootScan analysis. Panels A and B represent the partial alignments used for the determination of the crossovers in CT680/*rpsB* and the CT681/*ompA*, respectively. Panel C shows the genetic localization of those partial alignments.
