# Supplementary material for: In Silico Scrutiny of Genes Revealing Phylogenetic Congruence with Clinical Prevalence or Tropism Properties of Chlamydia trachomatis Strains
Source: PubMed Central journal article supplement (PMC4291473; doi:10.1534/g3.114.015354), 2014-11-05
Supplement: supp_g3.114.015354_TableS1.pdf [file supp_g3.114.015354_TableS1.pdf]

**Table S1 C. trachomatis strains used in the present study.**

| Strains      | Accession nº. | Isolation location | Reference              |
|--------------|---------------|--------------------|------------------------|
| A/Har13      | CP000051      | Conjunctiva        | Carlson et al. 2005    |
| A/2497       | FM872306      | Ocular             | Harris et al. 2012     |
| A/363        | HE601796      | Ocular             | Harris et al. 2012     |
| A/5291       | HE601810      | Ocular             | Harris et al. 2012     |
| A/7249       | HE601797      | Ocular             | Harris et al. 2012     |
| B/TZ1A828/OT | FM872307      | Ocular             | Seth-Smith et al. 2009 |
| B/Jali20/OT  | FM872308      | Ocular             | Seth-Smith et al. 2009 |
| C/TW-3       | CP006945      | Conjunctiva        | Borges et al. 2014     |
| D/UW-3/CX    | AE001273      | Cervix             | Stephens et al. 1998   |
| D(s)/2923    | ACFJ01000001  | Cervix             | Jeffrey et al. 2010    |
| D/SotonD1    | HE601798      | Endocervix         | Harris et al. 2012     |
| D/SotonD5    | HE601799      | Endocervix         | Harris et al. 2012     |
| D/SotonD6    | HE601800      | Endocervix         | Harris et al. 2012     |
| E/Bour       | HE601870      | Ocular             | Harris et al. 2012     |
| E/SW2        | FN652779      | Urethra            | Unemo et al. 2010      |
| E/SW3        | HE601801      | Cervix             | Harris et al. 2012     |
| E/SotonE4    | HE601802      | Endocervix         | Harris et al. 2012     |
| E/SotonE8    | HE601803      | Endocervix         | Harris et al. 2012     |
| E/11023      | CP001890      | Cervix             | Jeffrey et al. 2010    |
| E/150        | CP001886      | Rectum             | Jeffrey et al. 2010    |
| F/SW4        | HE601804      | Cervix             | Harris et al. 2012     |
| F/SW5        | HE601805      | Cervix             | Harris et al. 2012     |
| F/SotonF3    | HE601806      | Endocervix         | Harris et al. 2012     |
| F(s)/70      | ABYF01000001  | Cervix             | Jeffrey et al. 2010    |
| G/9301       | CP001930      | Urethra            | Jeffrey et al. 2010    |
| G/9768       | CP001887      | Rectum             | Jeffrey et al. 2010    |
| G/11222      | CP001888      | Cervix             | Jeffrey et al. 2010    |
| G/11074      | CP001889      | Rectum             | Jeffrey et al. 2010    |
| G/SotonG1    | HE601807      | Endocervix         | Harris et al. 2012     |
| J/6276       | ABYD01000001  | Cervix             | Jeffrey et al. 2010    |
| Ia/SotonIa1  | HE601808      | Endocervix         | Harris et al. 2012     |
| Ia/SotonIa3  | HE601809      | Endocervix         | Harris et al. 2012     |
| K/SotonK1    | HE601794      | Endocervix         | Harris et al. 2012     |
| L1/440/LN    | HE601950      | Lymph node         | Harris et al. 2012     |
| L1/1322/p2   | HE601951      | Genital ulcer      | Harris et al. 2012     |
| L1/115       | HE601952      | LGV patient        | Harris et al. 2012     |
| L1/224       | HE601953      | LGV patient        | Harris et al. 2012     |
| L2/434/Bu    | AM884176      | Lymph node         | Thomson et al. 2008    |
| L2/25667R    | HE601954      | Rectal biopsy      | Harris et al. 2012     |
| L2b/UCH-1    | AM884177      | Rectum             | Thomson et al. 2008    |
| L2b/8200/07  | HE601795      | Rectum             | Harris et al. 2012     |
| L2b/UCH-2    | HE601956      | Rectum             | Harris et al. 2012     |
| L2b/Canada1  | HE601963      | Rectum             | Harris et al. 2012     |
| L2b/Canada2  | HE601957      | Rectum             | Harris et al. 2012     |
| L2b/LST      | HE601958      | Rectum             | Harris et al. 2012     |
| L2b/CV204    | HE601960      | Rectum             | Harris et al. 2012     |
| L2b/795      | HE601949      | Rectum             | Harris et al. 2012     |
| L2b/Ams1     | HE601959      | Penile ulcer       | Harris et al. 2012     |
| L2b/Ams2     | HE601961      | Anus               | Harris et al. 2012     |
| L2b/Ams3     | HE601962      | Anus               | Harris et al. 2012     |
| L2b/Ams4     | HE601964      | Anus               | Harris et al. 2012     |
| L2b/Ams5     | HE601965      | Anus               | Harris et al. 2012     |
| L3/404/LN    | HE601955      | Lymph node         | Harris et al. 2012     |

**Table S2 Bioinformatical results of all C. trachomatis ORFs with detailed information of putative pseudogenes, strains' segregation, overall mean distances and dN/dS values.** The genes' annotation corresponds to the D/UW3-CX strain.

Table S2 is available for download as an Excel file at <http://www.g3journal.org/lookup/suppl/doi:10.1534/g3.114.015354/-/DC1>
