# Supplementary material for: In Silico Scrutiny of Genes Revealing Phylogenetic Congruence with Clinical Prevalence or Tropism Properties of Chlamydia trachomatis Strains
Source: G3 (Bethesda). 2014 Nov 5;5(1):9–19. doi: 10.1534/g3.114.015354 (PMC4291473; doi:10.1534/g3.114.015354)
Supplement: Supporting Information [file supp_g3.114.015354_TableS2.xlsx]

## Sheet: Folha1
	Table S2 Bioinformatical results of all C. trachomatis ORFs with detailed information of putative pseudogenes, strains' segregation, overall mean distances and dN/dS values. The genes' annotation corresponds to the D/UW3-CX strain.
					Strains' Segregation													Overall Mean Distance (pairwise deletion; bootstrap = 1000 replicates)
	ORFs				Nucleotide						Amino acid							Nucleotide				Amino acid					dN/dS	Overall average (prob < 0,05)
			Putative pseudogene		Tropism	LGV	E/F+LGV	E/F	Genital	Ocular	Tropism	LGV	E/F+LGV	E/F	Genital	Ocular		Nº differences	[SE]	p-distance	[SE]	Nº differences	[SE]	p-distance	[SE]
	CT001		No			a						a						1.708	0.76	0.006	0.003	0.925	0.569	0.01	0.006		0.555556
	CT002 (gatC)		No															0.25	0.161	0.001	0.001	0.125	0.125	0.001	0.001		1
	CT003 (gatA)		No			a												1.933	0.869	0.001	0.001	0.525	0.519	0.001	0.001		0.333333
	CT004 (gatB)		No															1.675	0.7866	0.0011	0.0005	1.55	0.7522	0.0032	0.0015		7.5	0.0538
	CT005		No			a												4.375	1.278	0.004	0.001	1.608	0.808	0.004	0.002		0.222222
	CT006		No			a						a						0.85	0.599	0.001	0.001	0.85	0.609	0.004	0.003		-
	CT007		No			a												3.33	1.09	0.0035	0.0011	1.98	0.8	0.0063	0.0026		0.756098
	CT008 (rnhB_1)		No			a												2.4	0.98	0.0027	0.0011	0.53	0.49	0.0017	0.0016		0.142857
	CT009 (yfgA)		No															0	0	0	0	0	0	0	0		-
	CT010 (htrB)		No															1.5	0.7572	0.0011	0.0006	1.05	0.6186	0.0023	0.0014		1.11111	0.4404
	CT011		Yes (E/SW2)			a						a						5.4095	1.3371	0.0043	0.001	4.1333	1.1509	0.0099	0.0026		1.6	0.173
	CT012 (ybbP)		Yes (A/Har13)									a						2.5333	0.8863	0.0037	0.0013	1.7524	0.8039	0.0076	0.0035		1.02778	0.4764
	CT013 (cydA)		No			a				a		a						4.1553	1.2942	0.0031	0.001	2.4906	1.0952	0.0056	0.0024		0.702703
	CT014 (cydB)		No			a						a				a		4.1408	1.2193	0.0039	0.0012	2.5922	1.0231	0.0073	0.0027		0.833333
	CT015 (phoH)		No			a						a						4.7417	1.4844	0.0036	0.0011	2.5167	1.0826	0.0058	0.0025		0.5625
	CT016		No															3.6183	1.1835	0.005	0.0016	1.3004	0.6517	0.0054	0.0026		0.284211
	CT017		No			a						a						6.8083	1.5122	0.0052	0.0012	4.4333	1.2908	0.0102	0.003		0.61039
	CT018		No			a						a						5.4383	1.4531	0.0115	0.0032	3.9579	1.2498	0.0252	0.0079		1.83562	0.1494
	CT019 (ileS)		No			a				a		a						11.6865	2.0784	0.0038	0.0007	5.984	1.6125	0.0058	0.0015		0.433333
	CT020 (lepB)		No			a		a				a	a	a				13.8861	2.4464	0.0074	0.0013	4.0121	1.129	0.0064	0.0019		0.175439
	CT021		No			a		a				a		a				4.0417	1.2265	0.0054	0.0017	2.1333	0.91	0.0086	0.0036		0.488372
	CT022 (rpmE2)		Yes (D(s)/2932)			a				a		a				a		2.3009	0.8421	0.007	0.0026	1.1908	0.621	0.011	0.0057		0.982456
	CT023 (prfA)		No			a	a	a				a	a	a				2.4064	0.9395	0.0022	0.0009	0.894	0.569	0.0025	0.0016		0.292683
	CT024		No			a												2.275	0.8075	0.0026	0.0009	1.025	0.4882	0.0035	0.0017		0.301887
	CT025 (ffh)		No			a						a						4.7417	1.2386	0.0035	0.0009	1.7833	0.7087	0.004	0.0015		0.301587
	CT026 (rpsP)		No					a								a		1.5007	0.7	0.0043	0.0019	1.1045	0.5714	0.0095	0.005		1.63333	0.3068
	CT027 (trmD)		No			a		a										4.1422	1.2308	0.0039	0.0011	1.1292	0.5668	0.0032	0.0016		0.173913
	CT028 (rplS)		No			a		a										1.3333	0.7339	0.0036	0.0021	0	0	0	0		0
	CT029 (rnhB)		No			a		a		a						a		3.3904	1.0435	0.0052	0.0016	2.0493	0.8735	0.0094	0.004		0.546512
	CT030 (gmk)		No			a	a	a						a				1.0583	0.6487	0.0017	0.0011	0.525	0.4045	0.0026	0.002		0.461538
	CT031		No															0.8583	0.5951	0.0028	0.002	0.325	0.3332	0.0033	0.0034		0.347826
	CT032 (metG)		No			a		a				a		a				6.3583	1.6208	0.0038	0.001	3.6917	1.0896	0.0067	0.002		0.571429
	CT033 (recD_1)		No			a	a	a										6.45	1.629	0.0029	0.0007	2.25	0.9533	0.003	0.0013		0.288462
	CT034 (ytfF)		No			a		a				a						3.625	1.0697	0.0037	0.0011	1.975	0.7725	0.0061	0.0025		0.55102
	CT035		No			a	a	a				a	a	a				4.4833	1.2385	0.0058	0.0016	2.7667	1.068	0.0108	0.004		0.825397
	CT036		Yes (C/TW3)			a	a	a				a						3.425	1.1732	0.003	0.001	1.4333	0.6841	0.0038	0.0019		0.367347
	CT037		Yes (LGVs, prevalent genital)															0.7053	0.4358	0.002	0.0013	0.3684	0.2792	0.0032	0.0023		-
	CT038		No			a	a											1.5083	0.7269	0.0044	0.0022	0	0	0	0		0
	CT039 (dcd)		No			a	a	a				a		a				2.8417	1.0984	0.005	0.0019	1.0583	0.6422	0.0056	0.0035		0.287234
	CT039.1		No					a										0.925	0.6648	0.006	0.0042	0.525	0.5102	0.0105	0.011		0.743243
	CT040 (ruvB)		No			a		a										2.95	1.0429	0.0029	0.001	0.775	0.5209	0.0023	0.0016		0.144928
	CT041		No			a						a		a				2.6667	0.9389	0.0033	0.0012	1.775	0.7487	0.0066	0.0028		0.970588
	CT042 (glgX)		No			a		a				a		a				6.85	1.3731	0.0034	0.0007	2.55	0.9227	0.0038	0.0014		0.296875
	CT043		No															1.3	0.5981	0.0026	0.0012	0.4	0.3918	0.0024	0.0023		0.230769
	CT044 (ssb)		No															0.25	0.1731	0.0005	0.0004	0.25	0.1683	0.0016	0.0011		-
	CT045 (pepA)		No			a	a			a		a				a		8.3135	1.6893	0.0055	0.0011	3.1408	1.0215	0.0063	0.002		0.243697
	CT046 (hctB)		No			a	a					a						5.3688	1.4108	0.0096	0.0025	3.2021	0.9821	0.017	0.0054		0.697479
	CT047		No			a				a						a		2.7329	0.966	0.0029	0.001	1.0726	0.5615	0.0034	0.0018		0.346939
	CT048 (yraL)		No			a				a		a				a		4.7736	1.1107	0.0067	0.0016	2.9478	0.9194	0.0124	0.0039		0.705882
	CT049		No			a				a		a				a		70.2983	4.869	0.048	0.0033	38.902	3.5067	0.0799	0.0072		0.706452
	CT050		No			a				a		a				a		57.0922	4.4973	0.0347	0.0027	31.8055	3.0774	0.0582	0.0057		0.825243
	CT051		No			a				a		a				a		104.934	5.7884	0.0697	0.0038	46.5697	3.9747	0.093	0.0079		0.513986
	CT052 (hemN_1)		No			a		a		a		a				a		4.9405	1.1973	0.0044	0.001	1.5878	0.693	0.0042	0.0019		0.223404
	CT053		No															1.325	0.5946	0.003	0.0014	0.3583	0.2576	0.0024	0.0017		0.10989
	CT054 (sucA)		No			a				a		a				a		10.9782	2.3275	0.004	0.0009	7.3527	1.671	0.0081	0.0019		1.02703	0.4798
	CT055 (sucB_1)		No			a		a		a				a		a		5.2075	1.2961	0.0047	0.0012	1.3512	0.6141	0.0037	0.0017		0.160714
	CT056		No			a												1.3083	0.66	0.0018	0.0009	0.9083	0.5604	0.0037	0.0023		1.1875	0.4403
	CT057 (gcpE)		No			a		a		a						a		6.209	1.5923	0.0034	0.0009	0.0058	0.791	0.0033	0.0013		0.214286
	CT058		Yes (A/2497, A/363, A/5291, A/7249, B/Jali, B/TZ)			a		a				a		a				15.9815	1.9651	0.0146	0.0018	10.0463	1.5905	0.0276	0.0044		1.18797	0.2494
	CT059 (fer)		No			a		a				a						2.8533	1.015	0.0103	0.0036	0.56	0.389	0.0062	0.0044		0.10757
	CT060 (flhA)		No			a				a						a		5.3527	1.4915	0.003	0.0008	1.8781	0.8742	0.0032	0.0014		0.253968
	CT061 (fliA)		No			a						a						1.2083	0.5874	0.0016	0.0008	0.4	0.3864	0.0016	0.0015		0.206897
	CT062 (tyrS)		No			a												3.125	1.0043	0.0025	0.0008	0.7583	0.4771	0.0018	0.0011		0.163636
	CT063 (gnd)		No			a						a						5.275	1.3212	0.0037	0.0009	3.525	1.0835	0.0073	0.0023		0.853659
	CT064 (lepA)		No			a												4.1	1.3473	0.0023	0.0007	1.7583	0.7691	0.0029	0.0013		0.351351
	CT065		No			a						a						3.6417	1.1119	0.0023	0.0007	1.7083	0.6181	0.0032	0.0012		0.348837
	CT066		No															0.65	0.4152	0.0014	0.0009	0	0	0	0		0
	CT067 (ytgA)		No			a						a						3.0917	1.0448	0.0032	0.001	0.7583	0.46	0.0023	0.0014		0.104167
	CT068 (ytgB_1)		No			a				a		a				a		1.4194	0.6382	0.0018	0.0008	1.1205	0.5672	0.0043	0.0022		1.90909	0.2425
	CT069 (ytgC)		Yes (B/Jali20-OT)			a						a						3.4351	1.1528	0.0025	0.0008	1.3401	0.706	0.003	0.0016		0.357143
	CT070 (ytgD)		No			a				a		a						3.9057	1.2197	0.0041	0.0013	1.521	0.7898	0.0048	0.0024		0.347826
	CT071 (yaeM)		No			a						a						3.275	1.1595	0.0029	0.001	1.45	0.6873	0.0038	0.0018		0.274194
	CT072 (yaeL)		No			a						a						6.4917	1.419	0.0035	0.0008	4.6833	1.2278	0.0076	0.002		1.37037	0.2532
	CT073		No			a						a						4.05	1.1408	0.0041	0.0012	1.775	0.8732	0.0055	0.0027		0.526316
	CT074 (recF)		No			a		a		a								3.0102	1.0393	0.0027	0.0009	1.1451	0.6068	0.0031	0.0017		0.220339
	CT075 (dnaN)		No			a												1.575	0.7281	0.0014	0.0007	0.25	0.172	0.0007	0.0005		0.0882353
	CT076 (smpB)		No			a				a		a						1.8665	0.8428	0.0041	0.0018	0.836	0.5746	0.0055	0.0038		0.4375
	CT077 (yojL)		No			a		a		a		a		a		a		4.074	1.1728	0.0048	0.0013	1.373	0.6522	0.0048	0.0023		0.230769
	CT078 (folD)		No			a	a	a						a				2.5917	1.0968	0.003	0.0012	0.4	0.3929	0.0014	0.0014		0.0945946
	CT079		No															0	0	0	0	0	0	0	0		-
	CT080 (ltuB)		No					a						a				1.0333	0.5759	0.0035	0.002	0.6333	0.4352	0.0065	0.0048		0.736842
	CT081
	CT082		Yes (F/SW5)			a	a	a				a		a				9.1429	1.909	0.0054	0.001	5.989	1.4408	0.0107	0.0026		0.946429
	CT083		No			a						a						1.5167	0.6267	0.0031	0.0013	1.1583	0.6423	0.0072	0.0038		1.61905	0.2927
	CT084		No			a												3.1917	1.1183	0.003	0.001	0.4833	0.2804	0.0014	0.0008		0.08
	CT085		No			a						a						4.5417	1.2739	0.0026	0.0007	1.825	0.7471	0.0032	0.0013		0.326087
	CT086 (rpmB)		No			a												1.0833	0.5155	0.004	0.0019	0.25	0.1765	0.0028	0.0055		0.14
	CT087 (malQ)		Yes (F(s)/70 and G/11222)			a						a						4.022	1.2377	0.0025	0.0008	2.5385	0.9349	0.0048	0.0018		0.821429
	CT088 (sycE)		No															0.7833	0.5335	0.0018	0.0012	0.325	0.3154	0.0022	0.0022		0.290323
	CT089 (lcrE)		No			a						a						8.1335	1.8051	0.0064	0.0014	6.6248	1.5941	0.0157	0.0038		2.29412	0.0395
	CT090 (lcrD)		No															2.125	0.794	0.001	0.0004	0.4833	0.2956	0.0007	0.0004		0.130435
	CT091 (yscU)		No			a						a						3.1833	0.9984	0.0029	0.0009	1.525	0.7408	0.0042	0.002		0.434783
	CT092 (ychF)		No			a												1.75	0.6643	0.0016	0.0006	0.65	0.4197	0.0018	0.0012		0.290323
	CT093 (ribF)		No			a						a						5.6083	1.482	0.0062	0.0016	3.8417	1.207	0.0128	0.0038		1.14815	0.4047
	CT094 (truB)		No			a						a						1.9238	0.8385	0.0026	0.0012	0.9714	0.5941	0.004	0.0024		0.555556
	CT095 (rbfA)		No													a		0.4354	0.3007	0.0012	0.0008	0.2612	0.2577	0.0021	0.0021		0.533333
	CT096 (infB)		No			a						a						12.1083	2.3176	0.0045	0.0009	7.975	1.6173	0.0089	0.0018		1.02326	0.4665
	CT097 (nusA)		No			a						a						4.9	1.3559	0.0038	0.001	1.6917	0.7918	0.0039	0.0019		0.275362
	CT098 (rpsA)		No			a												5.75	1.4465	0.0034	0.0009	2.1333	0.8377	0.0037	0.0015		0.272727
	CT099 (trxB)		No			a						a						4.2417	1.3284	0.004	0.0012	1.8417	0.8472	0.0052	0.0025		0.361111
	CT100 (acpS)		No			a						a						1.1083	0.6069	0.0031	0.0017	0.7083	0.4835	0.006	0.0041		0.935484
	CT101		Yes (E/SW2,F/SW5,F/s70,G/11222, G/9768, Ia/SotonIa1,K/SotonK1)			a						a						1.6667	0.8961	0.0037	0.002	1.1111	0.7463	0.0074	0.005		0.942857
	CT102		No			a						a						1.925	0.7779	0.0042	0.0017	0.9833	0.6008	0.0064	0.0038		0.571429
	CT103		No			a						a						2.6583	0.9282	0.003	0.0011	1.4833	0.7719	0.005	0.0026		0.675676
	CT104 (fabI)		No			a												1.2917	0.6256	0.0014	0.0007	0.9167	0.6289	0.0031	0.0021		1
	CT105		Yes (Ocular, E/Bour, F(s)/70)			a			a			a			a			34.3079	4.1582	0.0174	0.0021	22.5659	3.034	0.0344	0.0045		1.2971	0.1499
	CT106 (yceC)		No		a	a			a	a	a	a			a	a		4.238	1.3141	0.0051	0.0015	2.9231	1.0829	0.0107	0.0039		1.71429	0.1572
	CT107 (mutY)		No			a				a		a				a		9.9797	1.7313	0.009	0.0016	4.4224	1.1316	0.012	0.0032		0.836735
	CT108 (ybgI)		No			a				a		a				a		2.4282	0.9164	0.0032	0.0012	1.7329	0.78	0.0069	0.0031		1.34615	0.3649
	CT109		No					a		a		a		a		a		2.5878	0.8714	0.0033	0.0011	1.688	0.8571	0.0064	0.0033		1.34615	0.344
	CT110 (groEL)		No			a		a		a	a	a			a	a		3.1074	1.0554	0.0019	0.0006	1.4224	0.7182	0.0026	0.0014		0.433333
	CT111 (groES)		No			a	a	a				a						2.2612	0.9004	0.0073	0.0028	0.836	0.5815	0.0082	0.0059		0.215569
	CT112 (pepF)		No			a		a		a		a		a		a		9.4615	1.6691	0.0052	0.0009	4.5936	1.2748	0.0076	0.0021		0.469136
	CT113 (clpB)		No			a		a		a						a		6.1509	1.4896	0.0024	0.0006	1.0508	0.5941	0.0012	0.0007		0.113208
	CT114		No			a				a								6.9971	1.6608	0.0048	0.0011	2.7213	0.8415	0.0056	0.0018		0.298851
	CT115 (incD)		No		a	a			a	a	a	a			a	a		13.9485	2.2486	0.0322	0.0051	7.3055	1.6493	0.051	0.0114		1.23891	0.2608
	CT116 (incE)		No		a	a			a	a		a				a		8.5522	1.763	0.0214	0.0045	7.2808	1.7075	0.0552	0.013		3.28235	0.0039
	CT117 (incF)		No			a		a				a		a				3.02	0.8851	0.01	0.0029	2.66	0.7949	0.0266	0.0082		2.40741	0.2944
	CT118 (incG)		No			a		a				a		a				3.28	0.8426	0.0065	0.0017	3	0.849	0.018	0.005		5.11765	0.0099
	CT119 (incA)		Yes [D(s)/2923]			a												5.365	1.3701	0.0072	0.0018	4.8824	1.3278	0.0198	0.0052		5.10526	0.002
	CT120 †		No			a						a						7.9347	1.501	0.038	0.0074	2.6502	0.888	0.039	0.0134		1.94152	0.0874
	CT121 (araD)		No					a						a				1.05	0.5466	0.0015	0.0008	1.05	0.5642	0.0046	0.0024		-
	CT122 (efp_1)		No				a	a					a					1.5667	0.7656	0.0028	0.0014	0.9333	0.6892	0.005	0.0037		0.71875
	CT123 (accB)		No			a		a						a				1.6	0.7709	0.0032	0.0016	0.8	0.5429	0.0049	0.0033		0.338028
	CT124 (accC)		No			a		a				a	a	a				4.2	1.2274	0.0031	0.0009	2.1417	0.8359	0.0047	0.0018		0.52381
	CT125 (rplM)		No					a						a				1.05	0.5332	0.0023	0.0012	0.925	0.5485	0.0062	0.0038		3.75	0.1366
	CT126 (rpsI)		No			a		a				a						1.725	0.7884	0.0044	0.002	0.525	0.4171	0.0041	0.0032		0.235294
	CT127 (ydhO)		No			a												1.4333	0.6568	0.0017	0.0008	0.5833	0.4506	0.0021	0.0016		0.3125
	CT128 (adk)		No									a						1.5333	0.6448	0.0021	0.0009	0.6333	0.4374	0.0026	0.0018		0.363636
	CT129 (glnP)		No			a												1.05	0.5699	0.0016	0.0009	0.125	0.1234	0.0006	0.0006		0.0769231
	CT130 (glnQ)		No			a						a						3.5833	1.0545	0.0051	0.0015	2.9333	1.0312	0.0126	0.0044		1.64865	0.25
	CT131		No			a						a						8.95	1.9203	0.0026	0.0005	3.675	1.1212	0.0032	0.001		0.340909
	CT132		No			a						a						1.65	0.7574	0.0013	0.0006	0.4	0.3847	0.0009	0.0009		0.142857
	CT133		No			a												2.175	0.8336	0.0027	0.0011	0.85	0.5076	0.0032	0.0019		0.3125
	CT134		No															1.9583	0.7771	0.0047	0.0018	0.825	0.3903	0.006	0.003		0.358025
	CT135		Yes (A/Har13, A/2497, B/Jali, F/SW4, J/6276)			a						a						5.0922	1.4118	0.005	0.0015	3.1259	1.0861	0.0092	0.0032		0.636364
	CT136		No			a						a						1.5333	0.6313	0.0021	0.0008	1.0083	0.4804	0.0042	0.002		0.5
	CT137 (ywlC)		No			a						a						3.3917	1.0718	0.004	0.0013	0.525	0.4057	0.0019	0.0014		0.079646
	CT138		No			a						a						2.0917	0.787	0.0022	0.0008	1.2	0.6239	0.0038	0.002		0.76
	CT139 (oppA_1)		No															3.125	1.0744	0.0024	0.0009	1.1083	0.6288	0.0026	0.0015		0.25
	CT140 (ydpP)		No			a						a						3.0833	0.9397	0.0045	0.0014	2.0333	0.827	0.0089	0.0036		0.976744
	CT141 (secA_1)		No															1.581	0.6505	0.0035	0.0015	0.781	0.3613	0.0053	0.0023		0.590909
	CT142		No			a						a						3.8733	0.9043	0.0045	0.001	3.34	0.8804	0.0117	0.0031		2.8	0.0348
	CT143		No			a						a						3.834	1.0151	0.0045	0.0012	2.8458	0.8187	0.0102	0.003		1.29412	0.3164
	CT144		No			a						a						30.6923	3.4148	0.0358	0.0038	12.037	2.1893	0.0422	0.0079		0.342262
	CT145		No			a						a						6.45	1.4742	0.0035	0.0008	2.05	0.8412	0.0033	0.0014		0.238806
	CT146 (ligA)		No			a						a						10.6917	1.8153	0.0054	0.0009	6.0417	1.3475	0.0091	0.0021		0.651515
	CT147 (EEA1)		No			a						a						36.043	3.2325	0.0083	0.0007	24.3084	2.982	0.0168	0.002		1.34848	0.0864
	CT148 (mhpA)		No			a						a						5.9417	1.5157	0.0039	0.001	2.4333	0.9393	0.0048	0.0018		0.363636
	CT149		No			a				a		a				a		5.8737	1.2984	0.0062	0.0014	4.0566	1.1933	0.0129	0.0038		0.953846
	CT150 (rpmG)		Yes (L1/440)			a						a						0.3429	0.3313	0.0022	0.0022	0.3429	0.3421	0.0066	0.0067		-
	CT151		No			a				a						a		6.91	1.5605	0.0046	0.001	3.2525	1.0275	0.0065	0.002		0.432432
	CT152 (ycfV)		No							a						a		1.3324	0.6327	0.002	0.0009	0.2612	0.2507	0.0012	0.0011		0.139535
	CT153		No			a				a	a	a			a	a		9.6633	1.9808	0.004	0.0008	5.2046	1.3971	0.0064	0.0017		0.571429
	CT154
	CT155		Yes (F(s)/70,B/Jali)															5.6264	1.5603	0.006	0.0017	2.5275	0.9972	0.0081	0.0032		0.527027
	CT156		Yes (F(s)/70)		a	a			a	a	a	a			a	a		2.9276	1.1274	0.0086	0.0034	2.8311	1.07	0.0251	0.0099		19.6667	0.0098
	CT157		Yes (A/2497,A/5291,C/TW3,F/SW4, L1/440/LN)		a	a			a	a	a	a			a	a		11.3103	2.0001	0.0094	0.0017	8.9379	1.7394	0.0224	0.0044		1.89286	0.0437
	CT158
	CT159
	CT160 †		Yes (B/Jali20)			a				a		a				a		19.5015	2.849	0.0413	0.0058	8.043	1.831	0.0514	0.0119		0.945498
	CT161		Yes (B/Jali20,C/TW3,E/SotonE8)		a	a			a	a	a	a			a	a		11.3869	2.1421	0.0154	0.0029	6.2033	1.623	0.0252	0.0066		2.6	0.018
	CT162 †		Yes (E/SotonE8,F(s)/70,J/6276, Ia/SotonIa1, Ia/SotonIa3)			a			a	a		a			a	a		22.6241	3.0201	0.0943	0.0124	9.7163	1.9237	0.123	0.0241		0.739097
	CT163		Yes (A/Har13, A/363, A/7249, C/TW3, E/150)			a				a		a				a		5.6755	1.4622	0.0037	0.001	4.3156	1.2195	0.0084	0.0024		1.44	0.2407
	CT164		No			a						a						0.525	0.4195	0.002	0.0017	0.525	0.4176	0.0061	0.0048		-
	CT165
	CT166
	CT167		Yes (C/TW3)
	CT168		Yes (F(s)/70,L1/1322,L2/434,L2/25667R)			a						a						1.2952	0.7395	0.0043	0.0024	0.828	0.5969	0.0083	0.0058		1
	CT169a		No															1.0083	0.5096	0.0058	0.0028	0.3583	0.2529	0.0062	0.0045		0.430556
	CT169 (trpR)		No			a						a						1.1083	0.5993	0.0039	0.0021	0.9833	0.6193	0.0105	0.0066		4.33333	0.1284
	CT170 (trpB)		Yes (A/Har13, B/TZ)															1.2261	0.5719	0.001	0.0005	0.649	0.2736	0.0017	0.0007		0.571429
	CT171 (trpA)		Yes (A's, B/Jali20, C/TW3 )			a												3.1554	1.0213	0.0041	0.0014	1.5476	0.6131	0.0061	0.0024		0.491228
	CT172 †		Yes (C/TW3)			a				a		a						27.2709	3.3878	0.0593	0.007	10.8621	1.9719	0.0714	0.0133		0.907407
	CT172.1 †		No															7.7624	1.4263	0.0421	0.0079	2.5656	0.7212	0.0416	0.0115		0.500994
	CT173
	CT174
	CT175 (oppA_2)		No			a						a						4.275	1.3475	0.0027	0.0008	3.025	0.9652	0.0057	0.0018		0.806452
	CT176 (dsbB)		No			a												0.4	0.3788	0.001	0.0009	0	0	0	0		0
	CT177 (dsbG)		No			a				a								2.2598	0.878	0.0032	0.0012	0.7794	0.4989	0.0033	0.0021		0.231884
	CT178		No			a						a						3.9649	1.1795	0.0033	0.001	2.4604	0.982	0.0061	0.0023		0.823529
	CT179		No			a						a						2.225	0.9205	0.0043	0.0018	1.5	0.7399	0.0088	0.0043		1.10256	0.4584
	CT180 (tauB)		No			a						a						3.3833	1.1367	0.0049	0.0016	2.3333	0.8647	0.0101	0.0036		0.716418
	CT181		No			a												2.85	0.9993	0.004	0.0013	1.175	0.7407	0.005	0.003		0.347826
	CT182 (kdsB)		No			a						a						4.725	1.3293	0.0062	0.0017	1.575	0.808	0.0062	0.0032		0.256198
	CT183 (pyrG)		No			a						a		a				4.9	1.4357	0.003	0.0008	2.9667	1.0368	0.0055	0.0019		0.764706
	CT184 (yqgF)		No			a		a					a					0.9333	0.6249	0.0021	0.0014	0.5333	0.5	0.0036	0.0034		0.72
	CT185 (zwf)		No			a		a				a		a				6.1667	1.5236	0.004	0.001	1.8083	0.7001	0.0036	0.0015		0.2125
	CT186 (devB)		No			a	a	a				a	a	a				3.0083	1.0348	0.0039	0.0014	1.0583	0.6405	0.0041	0.0025		0.202247
	CT187 (dnaX_1)		No			a	a	a					a					3.0417	1.0681	0.0035	0.0013	1.1917	0.6912	0.0041	0.0025		0.338983
	CT188 (tmk)		No					a						a				2.1	0.7784	0.0034	0.0013	1.05	0.5672	0.0052	0.0028		0.389831
	CT189 (gyrA_1)		No			a	a	a				a	a	a				7.9917	1.8009	0.0032	0.0007	3.6417	1.2219	0.0044	0.0015		0.388889
	CT190 (gyrB)		No			a		a				a		a				6.7583	1.7563	0.0028	0.0007	3.3833	1.1731	0.0042	0.0015		0.512821
	CT191		No			a	a	a						a				2.525	1.0613	0.0072	0.0029	0.525	0.4162	0.0045	0.0035		0.14375
	CT192		Yes (C/TW3, B/Jali,A/2497)			a	a	a				a	a	a				7.4892	1.6182	0.011	0.0023	5.0952	1.2684	0.0226	0.0057		0.915966
	CT193 (tgt)		No			a	a	a		a				a				3.106	1.0375	0.0028	0.0009	0.9216	0.4677	0.0025	0.0013		0.218182
	CT194 (mgtE)		No			a		a		a						a		4.135	1.2365	0.0029	0.0009	0.8142	0.5024	0.0017	0.0011		0.119403
	CT195		No			a				a		a				a		6.6618	1.5074	0.0061	0.0014	3.5385	1.0455	0.0097	0.0027		0.528736
	CT196		No			a						a						1.525	0.7142	0.0048	0.0022	0.8	0.5549	0.0075	0.0053		0.538462
	CT197 (gcp_1)		No			a				a								2.7765	0.9903	0.0027	0.001	0.4949	0.4679	0.0015	0.0014		0.1
	CT198 (oppA_3)		No			a						a						4.575	1.2776	0.0029	0.0008	3.4333	1.1406	0.0066	0.0023		1.65	0.2115
	CT199 (oppB_1)		No			a												3.5	1.244	0.0037	0.0013	1.15	0.68	0.0037	0.0022		0.257143
	CT200 (oppC_1)		No			a						a						1.9	0.8001	0.0022	0.0009	0.975	0.5306	0.0035	0.0019		0.566667
	CT201 (oppD)		No			a						a						3.675	1.1076	0.0044	0.0014	2.875	1.0316	0.0104	0.0038		1.84615	0.1588
	CT202 (oppF)		No			a						a						3.125	1.1055	0.0042	0.0015	1.775	0.7451	0.0072	0.003		0.666667
	CT203		No															0.4583	0.4415	0.0006	0.0006	0.4583	0.4285	0.0018	0.0018		-
	CT204 (ybhI)		No			a												3.1833	1.1131	0.0022	0.0008	1.6083	0.8661	0.0034	0.0018		0.384615
	CT205 (pfkA_1)		No			a						a						4.6546	1.2893	0.0028	0.0008	2.6052	0.9509	0.0047	0.0017		0.676471
	CT206		No			a				a								1.9536	0.7687	0.0024	0.0009	0.8781	0.5145	0.0032	0.0018		0.421053
	CT207 (pfkA_2)		No			a				a		a				a		5.9187	1.3505	0.0036	0.0008	3.4107	0.9972	0.0062	0.0018		0.738095
	CT208 (gseA)		No			a												3.8889	1.0599	0.003	0.0008	1.3529	0.6626	0.0031	0.0016		0.262295
	CT209 (leuS)		No			a						a						7.575	1.5781	0.0031	0.0006	4.9333	1.3523	0.006	0.0017		0.90625
	CT210 (hemL)		No			a						a						5.8083	1.4818	0.0046	0.0012	2.125	0.917	0.005	0.0023		0.258065
	CT211		No			a						a						2.125	0.8605	0.0037	0.0016	2	0.9088	0.0106	0.0047		8.5	0.0351
	CT212		No			a						a						1.425	0.7215	0.0032	0.0015	1.225	0.7641	0.0083	0.0053		-
	CT213 (rpiA)		No							a						a		1.4122	0.652	0.0019	0.0009	0.7779	0.5316	0.0032	0.0022		0.592593
	CT214		No			a				a		a				a		9.6401	1.9912	0.0059	0.0012	7.1916	1.6105	0.0131	0.0028		1.0625	0.4483
	CT215 (dhnA)		No			a				a		a						2.5806	1.0354	0.0025	0.001	2.0377	0.9415	0.0059	0.0026		1.11538	0.4533
	CT216 (xasA)		No			a				a						a		5.7126	1.3297	0.0041	0.001	2.6183	1.026	0.0056	0.0021		0.439394
	CT217 (ydaO)		No			a				a		a				a		2.1597	0.8498	0.0031	0.0012	1.3208	0.737	0.0056	0.0031		0.794118
	CT218 (surE)		No			a				a		a				a		2.6807	1.0454	0.0031	0.0012	1.6589	0.7155	0.0059	0.0026		0.852941
	CT219 (ubiA)		No			a						a						1.575	0.6832	0.0017	0.0008	0.925	0.5658	0.0031	0.0019		0.75
	CT220 (ubiX)		No			a												1.55	0.6756	0.0027	0.0012	0.65	0.5391	0.0034	0.0027		0.386364
	CT221 (yqfU)		No			a												3.5333	0.9742	0.0039	0.0011	2.425	0.8164	0.0081	0.0027		1.11429	0.4308
	CT221.1		No															0.6583	0.559	0.0047	0.0038	0.5333	0.5423	0.0116	0.0117		2.44	0.298
	CT222		Yes (F(s)/70) #			a						a						7.2504	1.6942	0.0187	0.0043	4.089	1.3079	0.0319	0.0101		1.14595	0.3228
	CT223		No			a				a		a				a		16.1872	2.6314	0.02	0.0033	14.1168	2.2	0.0526	0.0082		4.02941	0.0025
	CT224		No			a				a		a				a		1.6676	0.7703	0.0038	0.0017	1.3687	0.7	0.0093	0.0047		2.31579	0.1791
	CT225		No			a				a						a		1.1183	0.5402	0.0032	0.0014	0.4427	0.2652	0.0039	0.0022		0.465116
	CT226		No			a						a						3.2286	1.0555	0.0065	0.0021	2.066	0.884	0.0127	0.0054		1.03571	0.4748
	CT227		Yes (A/Har13)			a												1.7714	0.719	0.0044	0.0019	1.1619	0.634	0.0087	0.0049		0.857143
	CT228		Yes (B/TZ1A828/OT,B/Jali,C/TW3, D/SotonD6)			a				a		a				a		4.8997	1.5093	0.0083	0.0026	4.3656	1.3894	0.0223	0.007		4.36	0.0243
	CT229		No			a						a						9.84	1.662	0.0152	0.0026	9.1133	1.5154	0.0424	0.0073		4.01961	0.0002
	CT230		No			a						a						4.225	1.2035	0.0034	0.0009	2.5167	0.9318	0.0061	0.0023		0.75
	CT231		No			a												3.65	1.1814	0.0025	0.0008	0.5833	0.4609	0.0012	0.001		0.1
	CT232 (inB)		No						a	a					a	a		2.926	1.0771	0.0084	0.0029	2.1858	0.9222	0.019	0.008		1.34375	0.3428
	CT233 (incC)		No			a	a											3.8467	0.9452	0.0072	0.0018	1.8333	0.6391	0.0103	0.0034		0.45045
	CT234		No			a		a				a		a				13.5559	2.0981	0.0049	0.0008	5.0421	1.3816	0.0054	0.0015		0.405405
	CT235		No			a	a	a				a	a	a				1.9917	0.9012	0.0048	0.0021	1.9917	0.9346	0.0145	0.0066		-
	CT236 (acpP)		No			a						a						0.4	0.3761	0.0017	0.0017	0.4	0.411	0.0052	0.0051		-
	CT237 (fabG)		No			a	a	a										2.3833	0.9612	0.0032	0.0013	1.05	0.5781	0.0042	0.0024		0.358491
	CT238 (fabD)		No			a		a				a		a				4.475	1.4016	0.0048	0.0015	1.85	0.9414	0.006	0.003		0.464789
	CT239 (fabH)		No			a	a	a				a	a	a				3.5917	1.2359	0.0037	0.0013	1.0583	0.6666	0.0032	0.0019		0.191781
	CT240 (recR)		No			a	a	a					a					3.6	1.2141	0.006	0.002	0.5333	0.5252	0.0027	0.0026		0.0584795
	CT241 (yaeT)		No			a	a	a				a		a				10.0583	2.0205	0.0042	0.0009	4.1083	1.2026	0.0052	0.0015		0.371429
	CT242		No					a						a				0.925	0.5589	0.0018	0.0011	0.525	0.4114	0.003	0.0023		0.652174
	CT243 (lpxD)		No			a												2.4417	0.8436	0.0023	0.0008	0.9917	0.4883	0.0028	0.0015		0.276596
	CT244		No			a	a	a				a	a	a				7.5913	1.6179	0.0071	0.0015	5.9713	1.4467	0.0168	0.004		2.70968	0.0057
	CT245 (pdhA)		No			a	a	a				a	a	a				1.3083	0.703	0.0013	0.0007	1.1833	0.6743	0.0035	0.002		3.5	0.111
	CT246 (pdhB)		No			a	a											1.8167	0.8986	0.0018	0.0009	0.8833	0.5679	0.0027	0.0018		0.333333
	CT247 (pdhC)		No				a	a				a	a	a		a		3.8766	1.3347	0.003	0.001	2.9361	1.1285	0.0068	0.0026		1.61905	0.2374
	CT248 (glgP)		No			a		a				a		a				7.0083	1.6803	0.0029	0.0007	3.475	1.0642	0.0043	0.0013		0.487805
	CT249		No			a		a				a		a				4.0867	1.1238	0.0116	0.0032	3.4133	1.0182	0.0294	0.0093		15.9091	0.0014
	CT250 (dnaA)		No			a		a				a		a				5.475	1.4718	0.004	0.0011	1.8667	0.8869	0.0041	0.002		0.263158
	CT251		No			a	a	a				a	a	a				8.8583	1.7378	0.0038	0.0007	4.8667	1.3547	0.0062	0.0018		0.5
	CT252 (lgt)		No			a		a				a	a	a				3.0333	1.0638	0.0037	0.0013	2.1083	0.9155	0.0078	0.0032		0.904762
	CT253		No															0.25	0.1737	0.0004	0.0003	0	0	0	0		0
	CT254		No			a		a				a		a				6.3537	1.6434	0.0082	0.0022	2.3793	1.0114	0.0093	0.004		0.324138
	CT255		No			a		a				a						2.0417	0.7902	0.0053	0.0021	0.65	0.4217	0.0051	0.0033		0.180556
	CT256		No			a		a				a		a				2.2583	0.9228	0.0018	0.0008	1.8583	0.8243	0.0045	0.0021		2.33333	0.179
	CT257		No			a		a				a		a				5.15	1.425	0.0042	0.0012	2.9083	0.9945	0.0072	0.0026		0.515625
	CT258 (yhfO)		No			a	a	a				a						2.6083	0.995	0.0023	0.0009	1.05	0.6665	0.0028	0.0017		0.35
	CT259		No			a		a				a		a				1.8583	0.8421	0.0025	0.0015	1.3333	0.7485	0.0054	0.003		1.21053	0.4209
	CT260		No			a		a										0.9333	0.6494	0.0019	0.0013	0	0	0	0		0
	CT261 (dnaQ_1)		No					a										1.2583	0.726	0.0018	0.001	0	0	0	0		0
	CT262		No			a	a	a				a	a	a				3.2833	1.1695	0.0043	0.0015	1.5833	0.8148	0.0062	0.0032		0.471212
	CT263		No			a		a				a		a				2.0167	0.8582	0.0034	0.0015	1.0333	0.5739	0.0053	0.0031		0.5
	CT264 (msbA)		No			a	a	a				a	a	a				5.975	1.6215	0.0031	0.0008	2.8917	1.0212	0.0045	0.0016		0.431373
	CT265 (accA)		No			a		a				a		a				4.5833	1.3285	0.0047	0.0013	1.05	0.5645	0.0032	0.0018		0.12931
	CT266		No			a	a	a				a		a				5.7	1.5674	0.0048	0.0013	3.1667	1.0439	0.0081	0.0027		0.65
	CT267 (ihfA)		No					a										0.4	0.3915	0.0013	0.0013	0	0	0	0		0
	CT268 (amiA)		No															0.5	0.2154	0.0007	0.0003	0.375	1.992	0.0016	0.0009		1.4	0.3442
	CT269 (murE)		No			a	a	a				a	a	a				6.1	1.6375	0.0042	0.0011	3.8583	1.2746	0.008	0.0027		0.860465
	CT270 (pbp3)		No			a		a						a				4.6167	1.5735	0.0024	0.0008	2.3583	0.8477	0.0036	0.0013		0.53125
	CT271		No				a											0.6583	0.5429	0.0023	0.0018	0	0	0	0		0
	CT272 (mraW)		No			a	a	a				a		a				3.45	1.1607	0.0038	0.0013	0.925	0.563	0.0031	0.0019		0.185185
	CT273		No			a						a						0.8	0.5427	0.0014	0.001	0.4	0.3911	0.0021	0.002		0.47619
	CT274		No															0	0	0	0	0	0	0	0		-
	CT275 (dnaA)		No									a						1.4167	0.688	0.001	0.0005	0.525	0.4184	0.0012	0.0009		0.333333
	CT276		No			a						a						1.2	0.6706	0.0021	0.0012	0.4	0.3743	0.0021	0.0021		0.25
	CT277		No			a						a						1.8583	0.8207	0.0028	0.0013	0.525	0.3792	0.0024	0.0019		0.153846
	CT278 (nqr2)		No			a								a				2.4667	0.9374	0.0016	0.0006	1.3083	0.6492	0.0026	0.0013		0.590909
	CT279 (nqr3)		No			a		a						a				2.2667	0.9638	0.0024	0.001	0.4	0.3711	0.0013	0.0012		0.0857143
	CT280 (nqr4)		No			a		a				a						2.9167	1.0852	0.0045	0.0016	0.4	0.3921	0.0019	0.0018		0.0841121
	CT281 (nqr5)		No			a	a	a				a		a				2.4	1.101	0.0033	0.0015	1.3333	0.7661	0.0055	0.0032		0.609756
	CT282 (gcsH)		No			a		a				a		a				8.1433	1.8556	0.023	0.0052	2.3514	1.0105	0.0201	0.0086		0.107692
	CT283		No			a		a				a		a				23.7986	3.3749	0.0115	0.0016	6.5128	1.6809	0.0094	0.0025		0.156934
	CT284		No			a		a										3.0833	1.0668	0.0022	0.0007	0.125	0.1219	0.0003	0.0003		0.0166667
	CT285 (lplA_1)		No			a						a						3.625	1.0682	0.005	0.0015	1.975	0.8205	0.0083	0.0033		0.518987
	CT286 (clpC)		No															3.775	1.0972	0.0015	0.0004	1.5833	0.7118	0.0019	0.0008		0.290323
	CT287 (mnmA)		No			a												3.05	0.9467	0.0028	0.0009	1.625	0.6959	0.0045	0.0019		0.4375
	CT288		No			a		a				a		a				16.5626	2.7599	0.0098	0.0016	13.6056	2.3116	0.0242	0.0041		2.54348	0.0031
	CT289		No			a						a						5.8333	1.4028	0.0051	0.0012	5.1833	1.3509	0.0136	0.0037		3.2	0.0298
	CT290 (ptsN_1)		No									a						1.6583	0.7456	0.0024	0.0011	0.65	0.4286	0.0029	0.0018		0.297872
	CT291 (ptsN_2)		No															0.7	0.3851	0.0015	0.0008	0.575	0.3641	0.0036	0.0023		1.6	1
	CT292 (dut)		No															1.6	0.5888	0.0037	0.0013	0.25	0.1726	0.0017	0.0012		0.0784314
	CT293 (accD)		No			a						a						8.4855	1.4695	0.0092	0.0016	1.5326	0.642	0.005	0.0021		0.0874525
	CT294 (sodM)		No			a						a		a				10.4615	2.0364	0.0168	0.0034	4.6267	1.3492	0.0225	0.0065		0.350932
	CT295 (mrsA_1)		No			a		a				a						12.3667	3.3017	0.0069	0.0013	4.7333	1.3402	0.008	0.0023		0.291339
	CT296		No				a						a					1.725	0.9421	0.0037	0.002	1.6	0.872	0.0103	0.0058		7.42857	0.0763
	CT297 (rnc)		No				a						a					1.975	0.9483	0.0028	0.0013	0.7833	0.5468	0.0034	0.0024		0.346939
	CT298 (radA)		No			a		a				a						4.0667	1.1966	0.003	0.0009	2.0917	0.8482	0.0046	0.0019		0.560976
	CT299 (hemC)		No															1.175	0.5758	0.0018	0.0009	0.325	0.3171	0.0015	0.0014		0.2
	CT300		Yes (LGV) #															1.8939	0.8208	0.0054	0.0023	0.6439	0.4476	0.0056	0.0038		0.27451
	CT301 (pknD)		No			a		a				a		a				9.9083	2.0322	0.0035	0.0007	6.2	1.4117	0.0066	0.0015		0.815789
	CT302 (valS)		No			a		a				a	a	a				8.4	1.8781	0.003	0.0007	5.1917	1.4411	0.0055	0.0016		0.666667
	CT303		No															0.6583	0.5355	0.0014	0.0011	0.6583	0.5184	0.0042	0.0033		-
	CT304 (atpK)		No			a												1.25	0.6354	0.0029	0.0015	0.325	0.3182	0.0023	0.0022		0.169231
	CT305 (atpI)		No			a	a	a				a	a	a				7.95	1.8121	0.0041	0.0009	4.2	1.2515	0.0065	0.002		0.603774
	CT306 (atpD)		No			a												1.5917	0.7275	0.0026	0.0012	0.5583	0.3836	0.0028	0.0019		0.297872
	CT307 (atpB)		No			a		a				a	a	a				13.3032	2.4405	0.0101	0.0019	2.4223	1.0585	0.0055	0.0024		0.0842105
	CT308 (atpA)		No			a		a				a	a					4.05	1.3836	0.0023	0.0008	1.5917	0.8678	0.0027	0.0014		0.288889
	CT309		No			a		a				a		a				5.975	1.57	0.0075	0.0019	3.2	1.1685	0.012	0.0044		0.387324
	CT310 (atpE)		No			a		a				a		a				6.2496	1.577	0.01	0.0025	1.6373	0.7287	0.0079	0.0035		0.165877
	CT311		No			a	a	a				a		a				11.8017	2.0788	0.0166	0.0029	6.1124	1.6067	0.0259	0.0067		0.522634
	CT312		No			a						a						6.7956	1.7462	0.0183	0.0045	1.4864	0.7946	0.0121	0.0067		0.111913
	CT313 (tal)		No			a						a						10.9351	2.1503	0.0111	0.0022	1.8959	0.773	0.0058	0.0023		0.0976431
	CT314 (rpoC)		No			a		a				a						59.1403	4.3914	0.0141	0.001	6.3311	1.5573	0.0045	0.0011		0.0515971
	CT315 (rpoB)		No			a		a				a	a	a				18.1833	3.0323	0.0048	0.0008	5.6417	1.3344	0.0045	0.0011		0.215686
	CT316 (rplL)		No															0.25	0.167	0.0006	0.0004	0.125	0.1225	0.001	0.0009		0.444444
	CT317 (rplJ)		No			a		a				a	a	a				2.8417	1.0617	0.0055	0.002	2.1917	1.0056	0.0127	0.0058		1.77778	0.2269
	CT318 (rplA)		No			a	a	a										4.625	1.3859	0.0066	0.002	0.8583	0.6075	0.0037	0.0026		0.116129
	CT319 (rplK)		No				a						a					2.1	0.9383	0.0049	0.0022	0.9083	0.5721	0.0064	0.0041		0.373494
	CT320 (nusG)		No			a		a				a						2.7083	0.9962	0.0049	0.0018	0.8833	0.4808	0.0049	0.0026		0.169118
	CT321 (secE)		No			a		a				a		a				2.4804	1.0348	0.01	0.004	2.4804	1.0217	0.0302	0.0125		-
	CT322 (tuf)		No			a	a	a				a		a				7.1324	1.7332	0.006	0.0015	1.8235	0.8846	0.0046	0.0022		0.175573
	CT323 (infA)		No			a												0.65	0.4146	0.0029	0.0018	0.125	0.1224	0.0017	0.0017		0.128571
	CT324		No			a						a						3.55	1.1944	0.0039	0.0013	1.725	0.8079	0.0057	0.0027		0.482143
	CT325		No			a						a						0.85	0.52	0.0019	0.0011	0.525	0.4212	0.0035	0.0029		0.9
	CT326		E/Bour is divided in two parts #
	CT326.1
	CT326.2		No															0	0	0	0	0	0	0	0		-
	CT327 (trpC)		No			a						a						1.975	0.7785	0.0031	0.0012	1.325	0.6904	0.0064	0.0033		0.909091
	CT328 (tpiA)		No			a	a					a						4.4083	1.2083	0.0053	0.0014	1.65	0.7231	0.006	0.0026		0.247706
	CT329 (xseA)		No			a	a					a						5.8	1.4746	0.0037	0.001	2.5667	0.8469	0.005	0.0017		0.315068
	CT330		No			a												1.45	0.7089	0.0053	0.0026	0.65	0.4214	0.0072	0.0047		0.411765
	CT331 (dxs)		No			a		a				a		a				4.6583	1.3696	0.0024	0.0007	2.2583	0.9032	0.0035	0.0014		0.414634
	CT332 (pykF)		No			a				a		a				a		4.5965	1.356	0.0032	0.0009	2.4775	0.8637	0.0051	0.0018		0.55814
	CT333 (uvrA)		No			a		a				a		a				12.5917	2.18	0.0024	0.0004	7.8667	1.6809	0.0044	0.0009		0.814815
	CT334 (dnaX_2)		No			a		a				a	a	a		a		3.7373	1.2146	0.0027	0.0009	1.7388	0.7831	0.0037	0.0017		0.439024
	CT335		No															0.125	0.1205	0.0004	0.0004	0.125	0.1257	0.0013	0.0013		-
	CT336 (ptsI)		No			a	a	a				a	a	a				3.475	1.2553	0.002	0.0008	1.7833	0.7803	0.0031	0.0015		0.518519
	CT337 (ptsH)		No			a		a				a		a				0.925	0.5585	0.0028	0.0017	0.925	0.5596	0.0085	0.005		-
	CT338		No				a						a					1.3167	0.725	0.0028	0.0016	1.1917	0.7522	0.0078	0.0048		4.875	0.1134
	CT339		No			a	a	a				a	a	a				3.1417	1.065	0.0023	0.0008	1.7083	0.7677	0.0037	0.0016		0.486486
	CT340 (pdhA/B)		No			a	a	a				a						2.8083	1.0667	0.0014	0.0005	1.475	0.5622	0.0022	0.0009		0.611111
	CT341 (dnaJ)		No			a		a						a				4.3991	1.2589	0.0037	0.0011	0.9013	0.5398	0.0023	0.0014		0.116279
	CT342 (rpsU)		No			a		a										0.925	0.567	0.0052	0.0033	0	0	0	0		0
	CT343		No			a		a						a				1.575	0.6858	0.0025	0.0011	1.05	0.56	0.005	0.0027		1.09091	0.4756
	CT344 (lon)		No			a		a				a		a				4.6167	1.4252	0.0019	0.0006	1.325	0.6899	0.0016	0.0008		0.190476
	CT345		No			a						a						1.325	0.6669	0.0036	0.0018	0.925	0.5594	0.0076	0.0047		1.03226	0.4838
	CT346 (elaC)		No			a		a				a		a				3.0583	1.1203	0.0033	0.0012	1.3333	0.7572	0.0044	0.0025		0.4
	CT347 (xerC)		No			a												2.1176	0.9066	0.0022	0.0009	0.1118	0.0822	0.0004	0.0003		0.0277778
	CT348 (yjjK)		No			a	a	a		a		a	a	a				4.9129	1.3265	0.0031	0.0008	2.7649	0.971	0.0052	0.0019		0.657895
	CT349 (maf)		No			a		a		a		a		a				1.6488	0.7114	0.0028	0.0012	0.8563	0.5963	0.0044	0.003		0.526316
	CT350		No			a	a	a				a	a	a				2.2417	1.0193	0.0013	0.0006	2.2417	0.8761	0.004	0.0016		-
	CT351		No			a		a										5.8476	1.3269	0.0028	0.0006	3.4286	1.0465	0.0049	0.0014		0.727273
	CT351a (secG)		No															0.25	0.1654	0.0008	0.0006	0.125	0.1252	0.0012	0.0012		0.545455
	CT352		No			a		a				a						1.3	0.6719	0.0042	0.0022	1.175	0.649	0.0116	0.0066		4.83333	0.1219
	CT353 (def)		No															0.725	0.4952	0.0013	0.0009	0.325	0.3054	0.0018	0.0017		0.45
	CT354 (ksgA)		No															2.1417	0.7318	0.0026	0.0009	0.9	0.4596	0.0032	0.0016		0.25
	CT355		No			a	a			a								3.283	1.0169	0.0031	0.001	0.7692	0.4331	0.0022	0.0012		0.15942
	CT356 (yyaL)		No			a		a				a		a				8.8	1.798	0.0042	0.0008	4.4083	1.191	0.0063	0.0017		0.516667
	CT357		No			a	a						a					1.4833	0.7204	0.0068	0.0034	1.0833	0.6461	0.015	0.009		1.5098	0.3616
	CT357R		No															0.25	0.1674	0.001	0.0007	0.125	0.1233	0.0015	0.0014		0.5
	CT358 †		No			a		a				a		a				13.7413	2.3843	0.0266	0.0047	5.9148	1.5748	0.0346	0.0096		0.958159
	CT359		No			a		a				a		a				3.2667	1.0913	0.0055	0.0018	1.6833	0.8099	0.0086	0.0041		0.545455
	CT360		No			a												3.5333	1.105	0.0067	0.0021	1.7	0.7781	0.0097	0.0046		0.5
	CT361 (dapA)		No			a						a						3.3583	1.0832	0.0039	0.0013	1.9833	0.7558	0.0069	0.0027		0.733333
	CT362 (lysC)		No			a												5.0667	1.4318	0.0039	0.0011	2.5917	0.9752	0.006	0.0023		0.441176
	CT363 (asd)		No			a												2.85	1.1366	0.0028	0.0011	0.625	0.5003	0.0019	0.0015		0.126761
	CT364 (dapB)		No			a						a						3.1118	1.0851	0.0041	0.0014	1.8345	0.8525	0.0073	0.0034		0.76087
	CT365		No			a						a						6.1993	1.3726	0.0036	0.0008	3.7899	0.9823	0.0066	0.0017		0.842105
	CT366 (aroA)		No			a				a		a				a		5.4224	1.5453	0.0041	0.0011	3.8113	1.2865	0.0087	0.0029		1.17143	0.3881
	CT367 (aroL)		No										a					2.0833	0.9291	0.0038	0.0016	1.7583	0.8248	0.0096	0.0047		2.875	0.1346
	CT368 (aroC)		No			a						a						3.85	1.2355	0.0036	0.0012	2.475	0.9514	0.0069	0.0027		0.837838
	CT369 (aroB)		No			a						a						1.9167	0.8762	0.0017	0.0008	0.8667	0.4896	0.0023	0.0013		0.461538
	CT370 (aroDE)		No			a				a		a				a		3.193	0.9068	0.0022	0.0006	1.0871	0.5793	0.0023	0.0012		0.22449
	CT371		No			a						a						3.35	1.0883	0.0043	0.0014	1.975	0.8671	0.0076	0.0034		0.580645
	CT372		No			a						a				a		5.2656	1.4594	0.004	0.0011	4.6734	1.3536	0.0106	0.003		3.92308	0.0156
	CT373 (aaxB)		Yes (LGV)			a												2.8917	0.9519	0.0062	0.0022	1.6417	0.7116	0.0099	0.0042		1.80769	0.2414
	CT374 (aaxD or arcD)		Yes (Ocular)			a						a						5.7692	1.6687	0.004	0.0012	4.0513	1.3149	0.0084	0.0027		1.17647	0.3825
	CT375		No			a												2.525	0.8395	0.0024	0.0008	0.9167	0.4427	0.0026	0.0013		0.288889
	CT376 (mdhC)		No			a						a						2.8333	0.8954	0.0029	0.0009	1.175	0.6874	0.0036	0.0021		0.529412
	CT377 (ltuA)		No															0.125	0.1245	0.0009	0.0009	0.125	0.1225	0.0027	0.0028		-
	CT378 (pgi)		No			a						a						5.0377	1.3552	0.0032	0.0009	4.1451	1.2117	0.0079	0.0023		2.375	0.0379
	CT379 (hflX)		No			a				a								3.894	1.1936	0.0029	0.0009	2.0827	0.809	0.0047	0.0017		0.648649
	CT380 (phnP)		No			a						a						3.9667	1.0648	0.005	0.0013	1.9833	0.735	0.0075	0.0027		0.888889
	CT381 (artJ)		No			a				a		a				a		4.5196	1.2913	0.0058	0.0017	1.672	0.703	0.0065	0.0028		0.24812
	CT382 (aroG)		No			a						a						1.2583	0.668	0.0015	0.0008	0.6333	0.4487	0.0023	0.0017		0.55
	CT382.1		No			a						a						1.05	0.5716	0.0055	0.003	1.05	0.603	0.0167	0.0092		-
	CT383		No		a	a			a	a	a	a			a	a		3.0377	1.0496	0.0042	0.0014	2.6647	1.0073	0.011	0.0041		4.41667	0.0347
	CT384		No			a				a								2.717	0.9943	0.0017	0.0006	0.4819	0.4188	0.0009	0.0008		0.105263
	CT385 (ycfF)		No															1.2917	0.53	0.0038	0.0015	0.6083	0.2999	0.0055	0.0029		0.457627
	CT386		No															2.475	0.9291	0.0028	0.0011	0.2333	0.2284	0.0008	0.0008		0.0410959
	CT387		No			a												5.9	1.3827	0.0028	0.0007	2.7167	0.9693	0.0039	0.0014		0.422222
	CT388		No					a										0.7583	0.4718	0.0025	0.0016	0	0	0	0		0
	CT389		No			a	a	a				a		a				3.9667	1.3277	0.0032	0.0011	2.3667	0.9529	0.0058	0.0023		0.5
	CT390 (aspC)		No			a		a				a						3.1417	1.0224	0.0027	0.0008	1.1583	0.6193	0.0029	0.0016		0.215385
	CT391		No			a												3.0726	0.8867	0.003	0.0009	1.8694	0.7468	0.0056	0.0022		0.634146
	CT392 (yprS)		No			a				a		a				a		6.0479	1.542	0.0053	0.0014	3.6938	1.2974	0.0098	0.0034		1.19512	0.3715
	CT393 (proS)		No			a		a		a		a		a		a		7.7358	1.7706	0.0044	0.001	2.7199	0.9262	0.0047	0.0017		0.280488
	CT394 (hrcA)		No			a		a		a		a				a		8.0711	1.6044	0.007	0.0014	3.5269	0.9493	0.0091	0.0026		0.351145
	CT395 (grpE)		No							a						a		2.2104	0.7296	0.0039	0.0012	1.8157	0.6688	0.0096	0.0035		2.2381	0.1683
	CT396 (dnaK)		No			a				a								1.8853	0.7998	0.001	0.0004	0.357	0.3556	0.0005	0.0005		0.111111
	CT397 (vacB)		Yes (C/TW3)			a		a				a						8.4057	1.763	0.004	0.0008	2.6146	0.9293	0.0038	0.0013		0.222222
	CT398		No			a		a					a					2.525	1.1334	0.0033	0.0014	1.1917	0.7306	0.0047	0.0029		0.411765
	CT398.1		No			a		a				a	a					4.5524	1.3895	0.0046	0.0014	2.4952	1.0582	0.0076	0.0033		0.486486
	CT399 (yrbH)		No			a		a				a	a	a				4.65	1.3998	0.0047	0.0014	2.5167	1.0859	0.0077	0.0033		0.467532
	CT400 (sucB_2)		No				a						a					3.5417	1.2755	0.003	0.0011	2.7667	1.0826	0.0071	0.0028		3.09091	0.067
	CT401 (gltT)		No			a	a	a				a		a				2.9167	1.118	0.0024	0.0009	1.325	0.6957	0.0032	0.0017		0.378378
	CT402 (lpxK)		Yes (A/Har13)			a		a				a		a				4.8952	1.4237	0.0044	0.0013	2.1143	0.9545	0.0057	0.0025		0.355263
	CT403 (yjfH)		No			a	a	a				a	a	a				2.475	0.9517	0.0031	0.0012	1.9417	0.8115	0.0072	0.0029		2	0.2173
	CT404		No			a	a	a				a		a				4.3917	1.2916	0.0053	0.0016	0.9333	0.643	0.0034	0.0024		0.140496
	CT405 (ribC)		No			a	a	a										1.3149	0.6638	0.0022	0.0011	0.2482	0.1827	0.0012	0.001		0.113208
	CT406 (nrdR)		No				a											1.0667	0.7373	0.0023	0.0016	0	0	0	0		0
	CT407 (dksA)		No			a												0.4	0.3848	0.0011	0.001	0	0	0	0		0
	CT408 (lspA)		No			a		a				a		a				3.7417	1.2073	0.0074	0.0023	2.7083	0.9586	0.0162	0.0058		1.37931	0.2824
	CT409		No			a	a	a						a				4.3333	1.308	0.0032	0.001	1.6833	0.6957	0.0037	0.0016		0.310345
	CT410 (pcnB_1)		No			a		a				a		a				3.225	1.0372	0.0025	0.0008	1.5417	0.7469	0.0036	0.0017		0.36
	CT411 (lpxB)		No			a	a	a					a					3.1833	1.1236	0.0017	0.0006	1.1917	0.6922	0.002	0.0012		0.333333
	CT412 (pmpA)		No			a	a	a					a					3.9704	1.0469	0.0014	0.0004	2.3695	0.8397	0.0024	0.0009		0.75
	CT413 (pmpB)		No			a		a				a		a				30.9632	3.0917	0.0059	0.0006	24.5011	2.5874	0.014	0.0015		1.5814	0.029
	CT414 (pmpC)		No			a		a				a						26.601	2.9329	0.005	0.0006	19.6207	2.4135	0.0111	0.0014		1.35897	0.0741
	CT415 (yebL)		No			a		a				a						2.2583	0.896	0.0027	0.0011	1.0583	0.6681	0.0038	0.0024		0.475
	CT416		No			a						a						0.65	0.4196	0.0009	0.0006	0.65	0.4245	0.0028	0.0018		-
	CT417		No											a				1.975	0.8209	0.0023	0.0009	1.325	0.7014	0.0046	0.0023		0.75
	CT418 (obgE)		No			a		a				a		a				4.7833	1.3016	0.0047	0.0013	2.4	0.9362	0.0072	0.0027		0.415584
	CT419 (rpmA)		No			a						a						0.525	0.4079	0.0021	0.0016	0.4	0.3942	0.0048	0.0046		0.96
	CT420 (rplU)		No			a		a										0.9333	0.6277	0.0029	0.0019	0	0	0	0		0
	CT421		No			a		a				a						2.925	1.0365	0.0045	0.0016	1.2	0.662	0.0056	0.0031		0.296703
	CT421.1		No			a						a						0.4	0.3935	0.0025	0.0025	0.4	0.3967	0.0075	0.0074		-
	CT421.2		No				a						a					0.6583	0.5283	0.0041	0.0032	0.6583	0.5274	0.0124	0.0104		-
	CT422		No			a		a					a					1.3333	0.7326	0.0028	0.0015	0.5333	0.5263	0.0034	0.0033		0.361702
	CT423		No			a		a		a		a	a	a				4.717	1.4194	0.0042	0.0013	2.9463	1.1505	0.008	0.0031		0.575758
	CT424 (rsbV_1)		No					a										1.325	0.6756	0.0038	0.0019	0.125	0.1229	0.0011	0.0011		0.0363636
	CT425		No			a		a				a		a				4.0083	1.2028	0.0021	0.0006	2.2333	0.867	0.0036	0.0014		0.62963
	CT426		No			a		a				a		a				1.3333	0.7579	0.0012	0.0007	0.9333	0.6376	0.0025	0.0017		0.785714
	CT427		No				a						a					1.425	0.7657	0.0017	0.001	1.425	0.7672	0.0052	0.0027		-
	CT428 (ubiE)		No				a											0.9083	0.5514	0.0014	0.0008	0.25	0.1739	0.0012	0.0008		0.185185
	CT429		No			a												4.8917	1.3805	0.0049	0.0014	2.0667	0.868	0.0063	0.0027		0.352941
	CT430 (dapF)		No			a												1.1	0.5952	0.0013	0.0007	0.45	0.3321	0.0016	0.0012		0.363636
	CT431 (clpP_1)		No			a						a						1.6083	0.736	0.0028	0.0013	1.25	0.6875	0.0065	0.0037		1.61111	0.3025
	CT432 (glyA)		No			a						a						3.925	1.2399	0.0026	0.0008	1.975	0.7675	0.004	0.0016		0.527778
	CT433 (hemD)		No									a						1.8917	0.7877	0.0028	0.0012	1.05	0.6499	0.0047	0.0028		0.611111
	CT434 (ispF)		No															1.1417	0.5664	0.0021	0.001	0.6833	0.4153	0.0038	0.0024		0.76
	CT435 (cysJ)		No			a		a				a		a				4.725	1.4078	0.0045	0.0013	2.525	1.0698	0.0072	0.0031		0.571429
	CT436 (rpsJ)		No			a	a	a										1.3083	0.6683	0.0041	0.0021	0.25	0.1676	0.0024	0.0017		0.146341
	CT437 (fusA)		No				a	a					a	a				6.8417	1.6215	0.0033	0.0008	1.7917	0.8718	0.0026	0.0013		0.16
	CT438 (rs7)		No					a										0.925	0.6282	0.002	0.0013	0.525	0.5317	0.0033	0.0032		0.666667
	CT439 (rpsL)		No			a		a										1.975	0.8554	0.0053	0.0023	0	0	0	0		0
	CT440		No				a						a					0.5333	0.5235	0.0016	0.0015	0.5333	0.523	0.0048	0.0046		-
	CT441 (tsp)		No			a		a				a		a				6.5065	1.6729	0.0034	0.0009	2.8781	1.0716	0.0045	0.0016		0.350877
	CT442 (crpA)		Yes (C/TW3)			a						a						7.9811	1.7596	0.0177	0.0041	7.098	1.6374	0.0475	0.0105		2.6506	0.0107
	CT443 (omcB)		No			a						a						5.6267	1.3734	0.0034	0.0008	3.82	0.9743	0.007	0.0018		1.0625	0.4523
	CT444 (omcA)		No			a						a						0.8	0.5551	0.003	0.0021	0.8	0.5743	0.0091	0.0063		-
	CT444.1		No					a						a				0.7428	0.4514	0.0033	0.0019	0.7428	0.4252	0.01	0.0059		-
	CT445 (gltX)		No			a		a				a		a				3.7167	1.2272	0.0024	0.0008	0.9333	0.607	0.0018	0.0012		0.173077
	CT446 (euo)		No			a	a	a						a				1.9917	0.9401	0.0036	0.0016	0.525	0.4072	0.0029	0.0021		0.181818
	CT447 (recJ)		No			a		a				a		a				4.5083	1.3322	0.0026	0.0007	3.525	1.1691	0.006	0.0019		1.86667	0.1419
	CT448 (secD/secF)		Yes (A/Har13)			a	a	a		a		a	a	a		a		14.2557	2.025	0.0034	0.0005	8.4985	1.7349	0.0061	0.0012		0.707317
	CT449		No			a		a				a		a				0.9333	0.6437	0.0028	0.0029	0.9333	0.6723	0.0085	0.0062		-
	CT450 (yaeS)		No			a	a	a		a								2.2598	0.9395	0.003	0.0012	0	0	0	0		0
	CT451 (cdsA)		No			a				a		a				a		3.8694	1.1698	0.0042	0.0013	3.1553	1.1081	0.0103	0.0037		2.13043	0.1347
	CT452 (cmk)		No			a		a				a		a				3.125	0.9385	0.0048	0.0014	1.7	0.7056	0.0079	0.0033		0.464286
	CT453 (plsC)		No					a						a				1.225	0.5442	0.0019	0.0008	0.8667	0.4922	0.004	0.0023		1.1875	0.408
	CT454 (argS)		No				a	a		a		a	a	a				3.8694	1.093	0.0023	0.0009	2.8781	0.9373	0.0051	0.0017		1.19048	0.2924
	CT455 (murA)		No			a		a		a		a						4.4746	1.2629	0.0034	0.0009	1.762	0.7897	0.004	0.0017		0.253521
	CT456 (Tarp)		No		a	a			a	a	a	a			a	a		37.1633	3.0579	0.014	0.0012	24.9067	2.5002	0.0281	0.0028		1.35135	0.0376
	CT457 (yebC)		No			a		a		a				a				2.8331	0.9803	0.004	0.0014	1.8171	0.7976	0.0076	0.0033		0.902439
	CT458 (YhhY)		No															0.45	0.3427	0.0009	0.0007	0.125	0.1245	0.0007	0.0007		0.166667
	CT459 (prfB)		Yes (C/TW3)			a	a	a		a		a	a	a				3.5283	1.1236	0.0036	0.0011	2.6226	0.9942	0.008	0.003		1.15625	0.4301
	CT460		No			a		a						a				1.3	0.7281	0.005	0.0028	0.9	0.6381	0.0105	0.0072		0.960784
	CT461 (yaeI)		No			a		a				a	a	a				4.7667	1.4092	0.0049	0.0015	2.1083	0.8311	0.0065	0.0027		0.306931
	CT462 (ispD)		No			a						a						2.225	0.8184	0.0034	0.0013	0.525	0.3964	0.0024	0.0018		0.164384
	CT463 (truA)		No			a						a						3.9417	1.1867	0.0049	0.0014	1.8083	0.7604	0.0068	0.0028		0.351648
	CT464		No			a	a	a					a					2.6833	0.9837	0.004	0.0014	1.425	0.7538	0.0064	0.0034		0.607843
	CT465		No					a						a				1.45	0.7353	0.0023	0.0012	1.325	0.7722	0.0062	0.0035		4.83333	0.0897
	CT466		No			a		a				a		a				2.375	1.0194	0.0072	0.003	1.05	0.6858	0.0096	0.0059		0.449541
	CT467 (atoS)		No			a		a						a				2.9	1.0852	0.0027	0.001	1.575	0.7377	0.0045	0.0021		0.511628
	CT468 (atoC)		No			a		a						a				1.3	0.6015	0.0011	0.0005	0.9	0.4439	0.0023	0.0012		0.769231
	CT469		No															0.125	0.1153	0.0002	0.0002	0.125	0.1201	0.0007	0.0007		-
	CT470 (recO)		No			a		a				a		a				8.6614	1.7712	0.0118	0.0023	3.3446	1.1708	0.0138	0.0047		0.577181
	CT471		No			a		a						a				2.7167	0.9161	0.0047	0.0016	1.7917	0.7193	0.0093	0.0038		0.811321
	CT472		No			a		a		a		a		a				2.1132	0.9557	0.0027	0.0012	0.9579	0.6463	0.0036	0.0025		0.439024
	CT473		Yes (E/Bour,E/SW2,F/SW5,F/s70)			a												0.4848	0.4673	0.0015	0.0015	0	0	0	0		0
	CT474		No			a	a	a		a		a	a	a		a		3.1684	1.0707	0.0034	0.0012	2.0334	0.8989	0.0066	0.0028		0.492063
	CT475 (pheT)		No			a	a	a				a	a	a				7.5083	1.7484	0.0032	0.0007	4.45	1.3695	0.0056	0.0017		0.717949
	CT476		No			a		a				a						2.6417	0.9545	0.0027	0.001	0.8	0.5668	0.0025	0.0018		0.178571
	CT477 (ada)		No				a	a					a					3.2167	1.1971	0.0063	0.0022	2.2833	0.9714	0.0134	0.0057		1.15094	0.4381
	CT478 (oppC_2)		No			a	a	a				a	a	a				9	1.9234	0.0052	0.0011	5.175	1.364	0.009	0.0023		0.569444
	CT479 (oppB_2)		No			a												2.05	0.9136	0.0014	0.0006	1.0167	0.564	0.0022	0.0012		0.407407
	CT480 (oppA_4)		No			a						a						2.6	0.8812	0.0012	0.0004	1.95	0.7323	0.0028	0.001		1.44444	0.2921
	CT480.1 †		No			a						a						4.3627	1.1146	0.0278	0.0072	1.5694	0.6796	0.0312	0.0135		0.779343
	CT481		No			a				a		a						2.6894	1.0219	0.0037	0.0014	2.1277	0.9686	0.0088	0.0038		1.77273	0.1746
	CT482		No			a						a						0.65	0.4189	0.001	0.0006	0.65	0.4278	0.003	0.002		-
	CT483		No			a												1.5333	0.5896	0.0043	0.0017	0.5	0.2414	0.0042	0.0021		0.253012
	CT484		No			a						a						2.6167	0.943	0.0026	0.001	0.775	0.4546	0.0023	0.0013		0.144928
	CT485 (hemH)		No			a						a						3.2667	1.0603	0.0035	0.0011	2.3667	0.915	0.0075	0.0028		1.24138	0.3607
	CT486 (fliY)		No			a						a						1.8167	0.7742	0.0023	0.001	0.65	0.4194	0.0025	0.0016		0.288889
	CT487 (yhhF)		No			a												2.7167	0.8006	0.0047	0.0014	1.0917	0.4169	0.0057	0.0022		0.292453
	CT488		No			a												1.425	0.6181	0.0019	0.0008	0.125	0.1221	0.0005	0.0005		0.0588235
	CT489 (glgC)		No			a		a				a						2.5083	1.0087	0.0019	0.0008	0.775	0.4415	0.0018	0.001		0.216216
	CT490		No									a						0.65	0.415	0.0026	0.0017	0.525	0.4063	0.0063	0.0049		2.21429	0.279
	CT491 (rho)		No			a		a				a		a				3.85	1.2212	0.0028	0.0008	1.325	0.6761	0.0029	0.0014		0.245614
	CT492 (coaE)		No			a						a						1.675	0.6519	0.0028	0.0011	0.9	0.4583	0.0045	0.0023		0.583333
	CT493 (polA)		No			a		a				a		a				11.125	2.079	0.0043	0.0008	4.3167	1.3178	0.005	0.0016		0.424242
	CT494 (sohB)		No			a	a	a				a	a	a				3.725	1.2244	0.0037	0.0012	1.9917	0.9828	0.006	0.0028		0.591837
	CT495		No			a	a	a				a		a				9.7083	2.1251	0.006	0.0014	6.2667	1.721	0.0116	0.0021		0.95
	CT496 (pgsA_1)		No			a		a				a		a				2.2583	0.9214	0.0045	0.0018	1.325	0.6822	0.0079	0.004		0.8
	CT496.1		No															0	0	0	0	0	0	0	0		-
	CT497 (dnaB)		No			a		a				a	a	a				3.95	1.2695	0.0028	0.0009	1.6917	0.7681	0.0036	0.0016		0.4
	CT498 (gidA)		No			a	a	a				a	a	a				6.5417	1.7496	0.0036	0.0009	2.625	1.0235	0.0043	0.0017		0.344262
	CT499 (lplA_2)		No															0	0	0	0	0	0	0	0		-
	CT500 (ndk)		No			a		a		a		a						1.775	0.7514	0.0042	0.0018	0.6836	0.5295	0.0048	0.0035		0.229167
	CT501 (ruvA)		No			a	a	a				a	a	a				2.4	0.9349	0.004	0.0015	2.15	0.9002	0.0108	0.0046		4.25	0.0486
	CT502 (ruvC)		No															0.125	0.1219	0.0002	0.0002	0.125	0.1206	0.0007	0.0007		-
	CT503		No				a						a					1.6	0.8818	0.0036	0.0019	1.6	0.8813	0.0107	0.0058		-
	CT504		No			a	a	a					a					4.0333	1.3111	0.0047	0.0015	1.85	0.927	0.0064	0.0032		0.416667
	CT505 (gapA)		No			a	a	a				a	a	a				3.7833	1.339	0.0038	0.0013	2.925	1.0992	0.0088	0.0033		1.83333	0.2016
	CT506 (rplQ)		No			a		a						a				1.6	0.8141	0.0038	0.0019	0.8	0.5251	0.0057	0.0038		0.58
	CT507 (rpoA)		No			a		a				a						2.7083	1.0011	0.0024	0.0009	0.65	0.432	0.0017	0.0011		0.176471
	CT508 (rs11)		No			a		a				a						1.05	0.5702	0.0026	0.0015	0.525	0.4194	0.004	0.003		0.392157
	CT509 (rpsM)		No			a		a				a		a				1.6	0.7803	0.0043	0.002	0.8	0.5595	0.0066	0.0046		0.533333
	CT510 (secY)		No			a		a				a	a	a				4.75	1.297	0.0035	0.001	2.5167	0.9784	0.0055	0.0022		0.636364
	CT511 (rplO)		No					a						a				1.475	0.5691	0.0034	0.0013	1.225	0.5697	0.0085	0.0038		2.5	0.1279
	CT512 (rpsE)		No															1.3083	0.6928	0.0026	0.0014	0.125	0.1185	0.0008	0.0008		0.0597015
	CT513 (rplR)		No			a		a				a		a				1.2	0.6731	0.0032	0.0018	1.2	0.6762	0.0098	0.0054		-
	CT514 (rplF)		No			a	a	a				a	a	a				3.175	1.1299	0.0058	0.002	1.5833	0.7769	0.0087	0.0042		0.494118
	CT515 (rpsH)		No			a	a	a					a					2.925	1.1097	0.0073	0.0028	0.5333	0.5151	0.004	0.004		0.118343
	CT516 (rplE)		No			a		a				a	a	a				2.7917	1.0585	0.0051	0.002	1.8667	0.9246	0.0104	0.0051		0.910714
	CT517 (rplX)		No			a	a						a					2.2333	0.9898	0.0066	0.0029	1.0667	0.7278	0.0096	0.0068		0.438776
	CT518 (rplN)		No			a	a	a				a						1.9583	0.8901	0.0053	0.0024	0.9	0.6163	0.0074	0.0052		0.444444
	CT519 (rpsQ)		No					a										0.4	0.378	0.0016	0.0015	0	0	0	0		0
	CT520 (rpmC)		No			a						a						0.8	0.5402	0.0037	0.0024	0.4	0.3689	0.0056	0.0057		0.54902
	CT521 (rplP)		No				a						a					0.6583	0.5459	0.0016	0.0013	0.5333	0.5195	0.0039	0.0038		2.11111	0.3093
	CT522 (rpsC)		No			a		a					a					2.575	0.9446	0.0039	0.0014	1.1417	0.6115	0.0052	0.0026		0.609756
	CT523 (rplV)		No			a		a					a	a				2.3917	0.9579	0.0071	0.003	1.5917	0.8283	0.0143	0.0072		1.0597	0.4752
	CT524 (rpsS)		No															0.125	0.12	0.0005	0.0004	0	0	0	0		0
	CT525 (rplB)		No					a						a				0.925	0.5372	0.0011	0.0006	0.525	0.4013	0.0018	0.0014		0.692308
	CT526 (rplW)		No			a	a	a					a					2.1167	0.9269	0.0063	0.0028	0.5333	0.5454	0.0048	0.0047		0.160839
	CT527 (rplD)		No			a		a				a		a				3.6583	1.1434	0.0055	0.0017	2.25	0.8751	0.0101	0.0039		0.684211
	CT528 (rplC)		No			a		a				a		a				2.0917	0.8436	0.0031	0.0013	1.333	0.7434	0.006	0.0034		0.882353
	CT529 (cap1)		No			a		a				a		a				12.38	1.8969	0.0138	0.0021	8.91	1.6883	0.0299	0.0056		1.5567	0.095
	CT530 (fmt)		No			a	a	a					a					2.8417	1.0458	0.003	0.0011	0.9833	0.6042	0.0031	0.0019		0.238806
	CT531 (lpxA)		No			a	a	a				a		a				1.8583	0.8195	0.0022	0.001	0.8	0.5357	0.0029	0.002		0.378378
	CT532 (fabZ)		No															0.125	0.1213	0.0003	0.0003	0.125	0.1256	0.0008	0.0008		-
	CT533 (lpxC)		No			a	a	a					a	a				2.775	1.1244	0.0032	0.0013	1.1833	0.6734	0.0041	0.0024		0.411765
	CT534 (lnt)		No			a	a	a				a	a	a				3.8417	1.1972	0.0024	0.0007	2.55	0.9011	0.0047	0.0016		0.958333
	CT535 (yciA)		No					a										0.925	0.568	0.0019	0.0012	0.125	0.1218	0.0008	0.0008		0.0547945
	CT536 (dnaQ_2)		No			a	a	a				a						1.775	0.7767	0.0024	0.001	0.8833	0.4674	0.0035	0.0019		0.545455
	CT537 (yjeE)		No			a	a	a				a	a	a				2.5	0.9805	0.0053	0.0021	1.8667	0.9518	0.0119	0.0059		1.57895	0.2953
	CT538		No			a		a				a		a				4.2167	1.2183	0.0059	0.0017	2.125	0.8229	0.0089	0.0036		0.511628
	CT539 (trxA)		No			a	a	a						a				1.1833	0.6421	0.0038	0.0021	0.525	0.3987	0.0051	0.0041		0.30137
	CT540 (yibK)		No			a						a						2.4833	0.8744	0.0054	0.002	0.6333	0.4291	0.0042	0.003		0.149254
	CT541 (mip)		No			a		a				a						2.475	0.9155	0.0035	0.0013	0.925	0.5448	0.004	0.0023		0.209302
	CT542 (aspS)		No			a		a				a		a				5.4083	1.5201	0.0031	0.0009	3.675	1.204	0.0063	0.002		1.07143	0.436
	CT543 (hisS)		No			a		a				a		a				2.9333	1.0494	0.0023	0.0008	2.1333	0.9158	0.005	0.0022		0.925926
	CT544 (uhpC)		No			a		a				a						3.65	1.0905	0.0027	0.0008	1.325	0.659	0.0029	0.0015		0.28
	CT545 (dnaE)		No			a		a		a		a						9.0885	1.6003	0.0024	0.0004	3.4891	1.067	0.0028	0.0009		0.288889
	CT546		No			a		a										1.5158	0.7469	0.0017	0.0008	0.1878	0.1177	0.0006	0.0004		0.047619
	CT547		No			a	a	a		a		a				a		4.0305	1.1251	0.0042	0.0012	1.6096	0.7109	0.0051	0.0022		0.315068
	CT548		No			a		a						a		a		2.1655	0.8392	0.0037	0.0014	1.016	0.5853	0.0052	0.003		0.428571
	CT549 (rsbW)		No					a						a				1.7833	0.7987	0.004	0.0019	0.525	0.4133	0.0036	0.0029		0.219512
	CT550		No					a						a				1.25	0.6209	0.0029	0.0015	0.925	0.57	0.0066	0.0038		1.42857	0.3689
	CT551 (dacC)		Yes (D/UW3)			a		a		a		a		a		a		4.319	1.309	0.0033	0.001	1.3537	0.6529	0.0031	0.0015		0.234375
	CT552		No															0.9167	0.6538	0.0022	0.0016	0.4583	0.4397	0.0034	0.0034		0.53125
	CT553 (fmu)		Yes (F/s70,G/11222,G/9768)
	CT554 (brnQ)		No			a		a				a		a				5.1	1.493	0.0041	0.0012	3.4417	1.1421	0.0084	0.0028		1.02564	0.4721
	CT555		No			a		a				a		a				9.1	1.9393	0.0025	0.0005	6.1917	1.5572	0.0052	0.0013		1.08696	0.423
	CT556		No			a						a						1.9417	0.9016	0.004	0.0019	1.3583	0.7787	0.0085	0.005		1.10526	0.4531
	CT557 (lpdA)		No			a						a		a				2.6833	1.0728	0.0019	0.0008	0.8	0.5528	0.0017	0.0011		0.190476
	CT558 (lipA)		No			a				a								1.9623	0.8998	0.0021	0.001	0.7431	0.4811	0.0024	0.0015		0.27027
	CT559 (yscJ)		No			a		a				a	a	a				4.9917	1.342	0.0051	0.0014	2.5083	0.9662	0.0077	0.003		0.440476
	CT560		No			a	a	a				a	a	a				1.7167	0.8743	0.0021	0.001	1.0583	0.6554	0.0038	0.0023		0.72
	CT561 (yscL)		No				a	a					a	a				3.1833	1.0285	0.0047	0.0016	1.5083	0.7121	0.0068	0.0033		0.452055
	CT562 (yscR)		No					a		a				a				3.7097	1.117	0.004	0.0012	0.5515	0.3886	0.0018	0.0013		0.0636364
	CT563 (yscS)		No															0.6583	0.5294	0.0023	0.0019	0.125	0.1322	0.0013	0.0013		0.107143
	CT564 (yyscT)		No			a		a						a				2.0417	0.7677	0.0023	0.0009	0.925	0.5496	0.0032	0.0019		0.28
	CT565		No			a						a						1.6333	0.7122	0.0037	0.0016	0.525	0.4052	0.0036	0.0027		0.253521
	CT566		No			a						a						1.875	0.7643	0.0019	0.0007	1.425	0.6637	0.0043	0.002		1.83333	0.2426
	CT567		No															0.95	0.5719	0.0018	0.0011	0.125	0.1207	0.0007	0.0007		0.0517241
	CT568		No			a						a						3.5965	1.1456	0.0084	0.0027	1.3273	0.7526	0.0093	0.0054		0.292517
	CT569		No															0.775	0.4431	0.0023	0.0014	0	0	0	0		0
	CT570 (gspF)		No			a						a						2.5083	1.0455	0.0021	0.0009	1.6583	0.6912	0.0042	0.0018		1.10526	0.4551
	CT571 (gspE)		No			a												2.9333	1.0028	0.0019	0.0007	1.2333	0.6579	0.0025	0.0013		0.342857
	CT572 (gspD)		No			a						a						4.95	1.3374	0.0022	0.0006	2.725	0.9123	0.0036	0.0012		0.62963
	CT573		No			a						a						5.1167	1.3931	0.0042	0.0012	3.25	1.0583	0.0079	0.0025		0.863636
	CT574 (pepP)		No			a						a						2.025	0.8181	0.0019	0.0008	1.05	0.6371	0.0029	0.0019		0.56
	CT575 (mutL)		No			a						a						5.05	1.474	0.0029	0.0009	3.475	1.176	0.006	0.0021		1.15385	0.3998
	CT576 (lcrH_1)		No			a						a						2.6583	0.9925	0.0038	0.0014	1.05	0.5911	0.0045	0.0025		0.308824
	CT577		No															0.775	0.4444	0.0022	0.0012	0.45	0.3529	0.0038	0.0028		0.666667
	CT578		No			a						a				a		4.6226	1.3316	0.0032	0.0009	3.2525	1.0835	0.0067	0.0021		0.885714
	CT579		No			a						a						7.4557	1.7606	0.0056	0.0013	2.5878	1.0577	0.0059	0.0024		0.300885
	CT580		No			a	a					a	a					4.6667	1.2563	0.0048	0.0013	1.8167	0.7158	0.0056	0.0021		0.381579
	CT581 (thrS)		No			a						a						4.15	1.2937	0.0022	0.0007	1.25	0.6834	0.002	0.0011		0.204082
	CT582 (minD)		No			a		a						a				3.25	1.1602	0.0042	0.0015	0.4	0.3805	0.0016	0.0015		0.0695652
	CT583 (gp6D)		No			a						a						2.4083	0.9692	0.003	0.0012	1.5583	0.7991	0.0059	0.0029		1.03448	0.4933
	CT584		No			a												0.775	0.4322	0.0014	0.0008	0.125	0.1203	0.0007	0.0007		0.0909091
	CT585 (trpS)		No			a		a				a	a	a				3.55	1.1497	0.0034	0.0011	2.625	1.0391	0.0076	0.0029		1.44	0.283
	CT586 (uvrB)		No			a		a				a		a				4.575	1.3831	0.0023	0.0007	2.75	0.9555	0.0041	0.0014		0.678571
	CT587 (eno)		No			a						a						2.025	0.9785	0.0016	0.0008	1.175	0.6518	0.0028	0.0016		0.684211
	CT588 (rbsU)		No			a						a						4.55	1.1326	0.0023	0.0006	3.1417	0.9986	0.0048	0.0015		1.15	0.3784
	CT589		No			a						a						5.7917	1.6457	0.0032	0.0009	3.6083	1.2303	0.006	0.0021		0.725
	CT590		No			a		a				a		a				9.75	2.1614	0.0034	0.0008	3.95	1.2806	0.0041	0.0013		0.327869
	CT591 (sdhB)		No			a	a	a				a	a	a				2.5167	0.9629	0.0038	0.0015	2.1167	0.9026	0.0097	0.0041		2.82353	0.1314
	CT592 (sdhA)		Yes (A/2497,B/TZ,E/SW2,F/SW5, F(s)/70,G/11222)
	CT593 (sdhC)
	CT593.1
	CT594 (ycfH)		No			a	a	a				a		a				2.95	1.025	0.0037	0.0013	1.4583	0.7489	0.0055	0.0029		0.538462
	CT595 (dsdD)		No			a	a	a				a	a	a				5.8	1.502	0.0028	0.0007	3.8	1.2475	0.0055	0.0018		0.962963
	CT596 (exbB)		No					a				a						1.0583	0.6416	0.0015	0.0009	0.4	0.4055	0.0017	0.0017		0.346154
	CT597 (exbD)		No			a	a	a					a					2.65	1.0851	0.0065	0.0027	1.1917	0.7453	0.0088	0.0054		0.409524
	CT598		No			a	a					a	a					2.675	0.988	0.0038	0.0014	2.55	0.9784	0.0109	0.0042		8.66667	0.0169
	CT599 (tolB)		No					a						a				2.6583	1.0645	0.0021	0.0009	1.2	0.672	0.0028	0.0015		0.4375
	CT600 (pal)		No			a		a										1.3333	0.7522	0.0024	0.0014	0	0	0	0		0
	CT601 (papQ)		No			a		a				a	a	a				4.4417	1.3007	0.0074	0.0022	1.5083	0.7299	0.0075	0.0037		0.324786
	CT602		No			a	a	a		a		a		a		a		3.6009	1.0982	0.0092	0.0029	1.7083	0.7943	0.0131	0.006		0.471429
	CT603 (ahpC)		No			a		a				a		a				8.1523	1.9261	0.0139	0.0033	2.7941	1.069	0.0143	0.0057		0.236923
	CT604 (groEL_2)		Yes (A/Har13)			a	a	a				a	a					15.142	2.7522	0.0095	0.0017	5.7302	1.4616	0.0108	0.0028		0.298851
	CT605 (ybbC)		No			a		a					a	a				9.2655	1.8863	0.0076	0.0015	1.5837	0.7534	0.0039	0.0019		0.0923077
	CT606 (yggV)		No			a						a						2.8833	0.9301	0.0046	0.0015	1.0333	0.6005	0.0049	0.0028		0.18254
	CT607 (ung)		No			a	a	a					a					6.0045	1.5581	0.0087	0.0022	1.457	0.7931	0.0064	0.0035		0.133641
	CT608 (uvrD)		No			a	a	a				a		a				8.2333	1.66	0.0043	0.0009	3.85	1.2902	0.0061	0.002		0.375
	CT609 (rpoN)		No			a	a	a				a	a	a				5.0667	1.4918	0.0039	0.0011	2.8	1.0462	0.0064	0.0023		0.416667
	CT610		No			a		a				a		a				1.9417	0.8842	0.0028	0.0013	1.4083	0.706	0.0062	0.003		1.12	1
	CT611		No			a						a						1.325	0.659	0.0018	0.0009	0.925	0.5572	0.0038	0.0023		1.26667	0.4248
	CT612 (folA)		No			a						a						0.65	0.4093	0.0014	0.0008	0.525	0.4067	0.0033	0.0025		1.875	0.3065
	CT613 (folP)		No			a		a				a		a				4.9083	1.4088	0.0036	0.0011	2.2583	0.9299	0.005	0.002		0.418182
	CT614 (folX)		No															0	0	0	0	0	0	0	0		-
	CT615 (rpoD)		No			a		a										3.5083	1.1808	0.0021	0.0007	0.45	0.3213	0.0008	0.0006		0.0701754
	CT616		No			a		a				a	a	a				3.1417	1.0914	0.0025	0.0009	1.1833	0.6667	0.0028	0.0016		0.264151
	CT617 (rpsT)		No			a		a				a		a				1.725	0.84	0.0058	0.0028	1.325	0.7511	0.0135	0.0074		1.20755	1
	CT618		No			a						a						9.8467	1.5706	0.0123	0.002	5.7233	1.2737	0.0215	0.0049		0.620112
	CT619		No			a	a	a				a	a	a				124.162	6.5518	0.0472	0.0025	48.4238	4.3638	0.0553	0.0051		0.352626
	CT620		No			a		a				a		a				29.4721	3.588	0.0118	0.0016	10.7353	2.0653	0.0129	0.0025		0.273109
	CT621		No			a		a				a		a				15.9507	2.7437	0.0064	0.0011	9.9318	1.9501	0.0119	0.0023		0.655172
	CT622		No			a	a	a				a	a	a				61.2769	4.7857	0.0314	0.0025	31.5169	3.2342	0.0485	0.005		0.538776
	CT623		No			a		a				a	a	a				12.5505	2.6228	0.0097	0.002	3.727	1.2023	0.0086	0.0028		0.172269
	CT624 (mviN)		No			a		a				a	a	a				14.4977	2.5126	0.0092	0.0016	5.0777	1.3673	0.0096	0.0027		0.268156
	CT625 (nfo)		No			a		a				a		a				9.625	1.967	0.0111	0.0022	3.3	1.1618	0.0115	0.004		0.186131
	CT626 (rpsD)		No			a						a						5.6961	1.5045	0.009	0.0024	1.724	0.7683	0.0082	0.0034		0.241379
	CT627 (yceA)		No			a						a						1.325	0.6713	0.0013	0.0007	0.4	0.3855	0.0012	0.0012		0.214286
	CT628 (ispA)		No			a		a				a		a				4.875	1.3527	0.0056	0.0016	1.4583	0.7674	0.005	0.0026		0.198413
	CT629 (glmU)		No				a						a					2.0833	0.9312	0.0034	0.0015	2.0833	0.9098	0.0102	0.0045		-
	CT630 (cpxR)		No			a		a				a	a	a				2.3583	0.8888	0.0034	0.0013	1.8333	0.7865	0.0081	0.0036		1.72727	0.2616
	CT631		No															0.2333	0.2265	0.0009	0.0009	0.2333	0.2244	0.0028	0.0027		-
	CT632		No			a						a						4.25	1.3598	0.0027	0.0009	2.35	0.9091	0.0044	0.0017		0.65625
	CT633 (hemB)		No															2.2	0.8946	0.0022	0.0009	1.025	0.5802	0.003	0.0017		0.238095
	CT634		No			a						a						2.8583	1.1041	0.002	0.0008	1.5333	0.7959	0.0033	0.0017		0.68
	CT635		No			a												1.375	0.6996	0.0032	0.0016	0.525	0.4843	0.0036	0.0035		0.145833
	CT636 (greA)		No			a						a						10.45	2.2104	0.0049	0.001	5.85	1.579	0.0082	0.0022		0.590909
	CT637 (tyrB)		No			a				a		a				a		7.6009	1.779	0.0063	0.0015	4.0972	1.3323	0.0102	0.0033		0.484536
	CT638
	CT638.1
	CT639 (recB)		No			a						a						16.6583	2.4359	0.0054	0.0008	8.025	1.9323	0.0078	0.0019		0.389474
	CT640 (recC)		No			a						a						28.316	3.5981	0.0094	0.0012	6.7179	1.59	0.0067	0.0016		0.149573
	CT641 (ygeD)		No			a		a				a		a				23.5965	3.3055	0.014	0.002	5.5528	1.4923	0.0099	0.0027		0.116883
	CT642		No			a		a				a		a				9.9713	2.0111	0.0124	0.0025	2.6373	1.0419	0.0099	0.0039		0.126506
	CT643 (topA)		No			a		a						a				16.425	2.4956	0.0064	0.001	2.7833	0.9642	0.0032	0.0011		0.0810811
	CT644 (yohI)		No			a		a				a		a				7.2833	1.6085	0.0072	0.0017	2.2167	0.8543	0.0066	0.0027		0.194118
	CT645		No			a						a						2.9344	1.0854	0.0099	0.0037	0.4827	0.4745	0.0049	0.0047		0.0641892
	CT646		No			a		a				a		a				22.0181	2.7716	0.016	0.002	6.2956	1.4958	0.0137	0.0034		0.255814
	CT647		No															0.375	0.2118	0.0006	0.0004	0.25	0.1832	0.0013	0.0009		1
	CT648		No			a		a				a	a	a				9.25	1.8464	0.0073	0.0014	2.4667	0.8905	0.0058	0.0021		0.146739
	CT649 (ygfA)		No			a		a				a		a				13.1848	2.1636	0.0246	0.004	5.3371	1.3382	0.03	0.0076		0.273897
	CT650 (recA)		No			a		a					a					20.3922	2.8351	0.0193	0.0027	1.6697	0.7996	0.0047	0.0023		0.0351759
	CT651		No			a	a	a				a	a	a				37.8228	4.0107	0.0207	0.0022	12.905	2.2858	0.0212	0.0038		0.195076
	CT652 (recD_2)		No					a						a				36.6176	3.9347	0.0246	0.0027	8.4314	1.881	0.017	0.0038		0.11756
	CT652.1		No					a										0.4	0.3752	0.0022	0.0022	0	0	0	0		0
	CT653 (yhgB)		No			a		a						a				7.1933	1.3851	0.01	0.0019	0.3333	0.3132	0.0014	0.0013		0.0236486
	CT654		No			a		a						a				5.3409	1.4263	0.0109	0.0028	1.6991	0.834	0.0105	0.0053		0.191176
	CT655 (kdsA)		No			a		a				a		a				5.175	1.3966	0.0064	0.0017	0.8	0.5439	0.003	0.002		0.0797546
	CT656		No			a						a						1.5083	0.7996	0.0051	0.0028	0.9833	0.6747	0.0101	0.0071		0.49505
	CT657		No			a						a						3.1373	1.1543	0.0131	0.0049	0.9653	0.6787	0.0122	0.0085		0.200743
	CT658 (sfhB)		No			a		a				a						12.4668	2.3055	0.0124	0.0022	2.2971	0.9581	0.0069	0.0029		0.0900621
	CT659		No															0.125	0.123	0.0005	0.0005	0	0	0	0		0
	CT660 (gyrA_2)		No			a												8.875	1.6646	0.006	0.0011	3.525	1.0818	0.0072	0.0023		0.343137
	CT661 (gyrB_2)		No			a						a		a				3.4833	1.111	0.0019	0.0006	1.825	0.8284	0.003	0.0014		0.424242
	CT662 (hemA)		No			a		a				a		a				6.6333	1.5975	0.0066	0.0016	5.4333	1.3586	0.0162	0.0041		2.40625	0.0321
	CT663		No			a				a		a						2.0145	0.8285	0.005	0.002	0.6967	0.482	0.0052	0.0036		0.268041
	CT664		No			a		a				a						7.8984	1.7274	0.0032	0.0007	3.5747	1.0947	0.0043	0.0013		0.35
	CT665		No			a						a						0.8	0.5317	0.0032	0.0021	0.8	0.5404	0.0096	0.0068		-
	CT666		No															0.8833	0.4756	0.0035	0.0019	0.125	0.1256	0.0015	0.0014		0.0752688
	CT667		No															0.25	0.1739	0.0006	0.0004	0	0	0	0		0
	CT668		No			a		a										2.1833	0.8968	0.0032	0.0013	0	0	0	0		0
	CT669 (yscN)		No			a		a										3.4103	1.1049	0.0026	0.0008	0.5965	0.3135	0.0013	0.0007		0.104478
	CT670		No			a		a		a		a						2.2787	0.8447	0.0045	0.0017	1.3237	0.7588	0.0079	0.0045		0.641509
	CT671		No			a		a		a				a		a		2.9855	1.0729	0.0035	0.0012	1.2874	0.6771	0.0046	0.0024		0.310811
	CT672 (fliN)		No			a		a		a		a						11.3149	2.0468	0.0101	0.0018	3.283	1.1467	0.0088	0.003		0.169492
	CT673 (pkn5)		No			a	a	a				a		a				3.5	0.9462	0.0024	0.0006	2.2917	0.926	0.0047	0.0019		0.869565
	CT674 (yscC or gspD_2)		No			a	a	a		a		a	a	a				45.9833	4.6691	0.0166	0.0017	7.6306	1.7254	0.0083	0.0019		0.0787879
	CT675 (karG)		No			a		a										22.65	3.0367	0.0211	0.0028	4.2267	1.2017	0.0119	0.0034		0.117241
	CT676		No			a	a											9.4233	1.9467	0.0181	0.0037	1.0333	0.545	0.006	0.0032		0.0540037
	CT677 (frr)		No			a	a	a				a						18.1967	2.4953	0.0337	0.0046	2.47	0.9002	0.0138	0.0049		0.0711423
	CT678 (pyrH)		No			a	a	a				a	a					10.86	1.6916	0.0147	0.0023	2.2	0.7624	0.009	0.0032		0.113208
	CT679 (tsf)		No			a		a										30.3133	3.5277	0.0357	0.0041	5.7067	1.4698	0.0202	0.0051		0.0842199
	CT680 (rpsB)		No			a		a				a	a	a				34.0452	3.3994	0.0401	0.0041	9.3355	1.791	0.0331	0.0061		0.168133
	CT681 (ompA)		No															143.651	6.7367	0.1213	0.0057	42.1038	4.1604	0.1069	0.0104		0.217231
	CT682 (pbpB)		No			a		a				a	a	a				39.8405	3.5534	0.0123	0.0011	9.0285	1.6425	0.0084	0.0015		0.124224
	CT683 (TPRmotif)		No			a		a				a		a				6.54	1.4198	0.0065	0.0014	1.5467	0.7407	0.0046	0.0021		0.147059
	CT684		No			a	a	a		a		a		a				10.1669	1.9457	0.007	0.0013	2.8215	1.0354	0.0058	0.0021		0.154321
	CT685		No					a		a				a		a		11.4078	2.1971	0.0149	0.003	3.0015	1.0598	0.0118	0.0041		0.152632
	CT686 (sufD)		No			a		a				a		a				11.7778	2.0189	0.0099	0.0017	4.7407	1.3161	0.012	0.0033		0.277228
	CT687 (yfhO_1)		No			a	a	a				a	a	a				9.3466	2.0693	0.0078	0.0017	1.5741	0.7457	0.0039	0.0019		0.0861244
	CT688 (parB)		No					a		a				a		a		7.688	1.7675	0.0091	0.0021	1.6938	0.8005	0.0061	0.0028		0.134884
	CT689 (dppF)		No			a		a		a				a				11.9347	2.2215	0.0144	0.0026	1.0914	0.5911	0.004	0.0022		0.0372807
	CT690 (dppD)		No			a		a										4.1	1.1013	0.0042	0.0011	1.1083	0.6184	0.0035	0.0019		0.156863
	CT691		No							a						a		1.479	0.556	0.0022	0.0008	1.1437	0.4804	0.0051	0.0021		1.85714	0.2241
	CT692		No			a		a		a		a		a				2.9057	0.9835	0.0023	0.0007	1.2671	0.6608	0.003	0.0015		0.416667
	CT693 (pgk)		No			a		a		a						a		4.2922	1.0901	0.0035	0.0009	2.9796	0.929	0.0074	0.0023		1
	CT694		No			a	a	a		a		a	a	a		a		10.9782	2.0439	0.0113	0.0021	9.447	1.8313	0.0293	0.0059		2.60714	0.0153
	CT695		No				a	a					a					3.0667	1.0179	0.0026	0.0009	1.9167	0.8797	0.0048	0.0022		0.806452
	CT696		No				a											1.675	0.7544	0.0014	0.0006	0.25	0.1764	0.0006	0.0004		0.075
	CT697 (nth)		No			a		a										2.125	0.8716	0.0033	0.0014	0.125	0.1206	0.0006	0.0006		0.0280374
	CT698 (trmE)		No			a		a										3.2917	1.1639	0.0025	0.0009	0.25	0.1629	0.0006	0.0004		0.0461538
	CT699 (psdD)		No					a						a				1.25	0.633	0.0014	0.0007	0.85	0.5133	0.0028	0.0018		1.16667	0.4685
	CT700		No			a		a						a				5.8447	1.5495	0.0044	0.0012	2.3149	0.9063	0.0052	0.002		0.316456
	CT701 (secA)		No			a		a		a			a					7.9797	1.7404	0.0027	0.0006	2.1074	0.9006	0.0022	0.001		0.166667
	CT702		No					a						a				0.8	0.5291	0.0015	0.0011	0.4	0.3937	0.0023	0.0023		0.5
	CT703 (engA)		No		a	a			a	a	a	a			a	a		3.5929	1.3008	0.0024	0.0009	1.6981	0.8799	0.0035	0.0018		0.34
	CT704 (pcnB_2)		No					a		a				a		a		2.6821	0.9287	0.0022	0.0008	1.1655	0.5889	0.0028	0.0015		0.382353
	CT705 (clpX)		No			a						a						3.35	1.0505	0.0027	0.0008	1.5	0.753	0.0036	0.0018		0.404762
	CT706 (clpP)		No			a												0.975	0.5888	0.0016	0.001	0	0	0	0		0
	CT707 (tig)		No			a		a				a						4.8167	1.4558	0.0036	0.0011	1.5	0.6748	0.0034	0.0015		0.231884
	CT708		No			a		a				a						6.05	1.3486	0.0017	0.0004	1.9	0.7898	0.0016	0.0007		0.210526
	CT709 (mreB)		No			a		a										2.25	0.8559	0.002	0.0008	0.125	0.1214	0.0003	0.0003		0.0166667
	CT710 (pckA)		No			a		a		a		a		a		a		6.2627	1.4664	0.0035	0.0008	2.389	0.949	0.004	0.0015		0.3125
	CT711		No			a		a				a		a				8.0697	1.8342	0.0035	0.0008	6.9245	1.5978	0.009	0.0021		3.07143	0.0131
	CT712		No			a		a				a	a	a				3.0417	1.0979	0.0026	0.0009	2.3917	0.9858	0.0061	0.0025		2.06667	0.1646
	CT713 (porB)		No			a	a	a				a	a	a				3.4466	1.071	0.0034	0.0011	2.4822	0.97	0.0073	0.0028		1.25	0.358
	CT714 (gpsA)		No										a					3.4917	1.0876	0.0035	0.0011	1.125	0.6127	0.0034	0.0018		0.192308
	CT715		No			a		a				a						4.2083	1.2879	0.0031	0.0009	1.1833	0.7012	0.0026	0.0015		0.209677
	CT716		No			a		a				a		a				1.3333	0.7467	0.0036	0.002	0.9333	0.6436	0.0077	0.0054		0.4875
	CT717 (fliI)		No			a	a	a				a		a				3.275	1.0815	0.0025	0.0008	1.9583	0.794	0.0045	0.0019		0.583333
	CT718		No					a						a				2.2833	0.8732	0.0045	0.0016	1.125	0.6533	0.0066	0.0038		0.548387
	CT719 (fliF)		No			a		a						a				3.2417	1.099	0.0032	0.0011	1.775	0.7522	0.0053	0.0023		0.490196
	CT720		No					a						a				1.8833	0.8562	0.0024	0.0011	0.9833	0.5829	0.0038	0.0022		0.515152
	CT721 (yfhO_2)		No			a		a						a				3.4167	1.1237	0.003	0.001	0.85	0.5051	0.0022	0.0013		0.152778
	CT722 (pgm)		No					a					a	a				2.0667	0.7919	0.003	0.0012	1.4167	0.7165	0.0063	0.0031		1.10714	0.4619
	CT723 (yjbC)		No			a												1.05	0.5643	0.0014	0.0008	0.65	0.4228	0.0027	0.0017		0.933333
	CT724		No			a	a	a				a	a	a				1.9833	0.9085	0.0038	0.0018	1.0583	0.6488	0.0061	0.0036		0.632653
	CT725 (birA)		No															1.2583	0.6043	0.0023	0.0011	0.2333	0.2282	0.0013	0.0012		0.113208
	CT726 (rodA)		No			a		a				a		a				2.5	0.8174	0.0022	0.0007	1.45	0.6965	0.0038	0.0019		0.692308
	CT727 (zntA)		No			a		a				a		a				6.7333	1.7861	0.0034	0.0009	3.0417	1.079	0.0046	0.0016		0.415094
	CT728		No			a		a				a						2.1	0.8379	0.0028	0.0012	0.925	0.5446	0.0037	0.0022		0.377778
	CT729 (serS)		No			a	a	a				a	a	a				2.7583	0.99	0.0021	0.0008	1.8333	0.7854	0.0043	0.0019		1
	CT730 (ribD)		No			a	a	a				a	a	a				3.8167	1.325	0.0034	0.0012	1.1833	0.6911	0.0032	0.0019		0.2
	CT731 (ribA/ribB)		No			a	a	a				a		a				4.4417	1.431	0.0035	0.0011	1.3333	0.7409	0.0031	0.0017		0.205128
	CT732 (ribH)		No					a										1.3833	0.7274	0.0029	0.0015	0	0	0	0		0
	CT733		No			a		a				a		a				5.375	1.4456	0.004	0.0011	3.3917	1.0672	0.0076	0.0023		0.925
	CT734		No			a	a	a				a	a	a				1.6417	0.8131	0.0025	0.0012	1.1833	0.6588	0.0054	0.003		1.3	0.4023
	CT735 (dagA_2)		No			a	a	a										4.2917	1.3251	0.0031	0.001	1.6417	0.6421	0.0036	0.0014		0.321429
	CT736 (ybcL)		No					a						a				1.2583	0.7045	0.0028	0.0015	0.4	0.3901	0.0027	0.0026		0.22807
	CT737		No				a											0.6583	0.5255	0.001	0.0008	0.125	0.1193	0.0006	0.0005		0.130435
	CT738 (yycJ)		No			a		a				a		a				3.2	1.1013	0.0041	0.0014	1.3333	0.7692	0.0051	0.0029		0.357143
	CT739 (fstK)		No			a	a	a				a	a	a				6.825	1.6388	0.0028	0.0007	2.7333	1.072	0.0034	0.0014		0.354167
	CT740 (dmpP)		No			a	a	a				a		a				5.3135	1.5357	0.0041	0.0013	3.8099	1.2262	0.0088	0.0029		1.13514	0.3941
	CT741 (yajC)		No			a		a				a						1.3333	0.7284	0.0039	0.0022	0.4	0.3792	0.0035	0.0034		0.209877
	CT742 (ygcA)		Yes (F(s)/70)			a		a				a	a	a				4.9905	1.4701	0.0042	0.0012	2.019	0.8724	0.0051	0.0022		0.308642
	CT743 (hctA)		No			a		a				a		a				1.7333	0.8296	0.0046	0.0022	0.9333	0.6672	0.0075	0.0052		0.578125
	CT744		No			a	a	a				a	a	a				4.975	1.2837	0.002	0.0005	3.2	1.1186	0.0039	0.0014		1.11765	0.4153
	CT745 (hemG)		No			a		a						a				4.2833	1.2223	0.0034	0.0009	2.4	0.9026	0.0057	0.0021		0.682927
	CT746 (hemN_2)		No			a	a					a		a				1.1833	0.6901	0.0009	0.0005	0.9333	0.6487	0.002	0.0014		2	0.2621
	CT747 (hemE)		No					a						a				2.15	0.8117	0.0021	0.0008	0.525	0.3929	0.0016	0.0012		0.181818
	CT748 (mfd)		No			a	a	a					a	a				9.8333	1.7333	0.003	0.0006	4.4083	1.3525	0.0041	0.0013		0.327586
	CT749 (alaS)		No			a	a	a				a	a	a				11.4417	2.4669	0.0044	0.0009	3.9833	1.3562	0.0046	0.0015		0.247191
	CT750 (tktB)		No			a	a	a					a					4.875	1.3556	0.0024	0.0007	1.6417	0.7811	0.0025	0.0012		0.192982
	CT751 (amn)		No			a		a				a		a				4	1.2398	0.0046	0.0015	2.6667	1.0345	0.0092	0.0037		1
	CT752 (efp_2)		No			a						a						0.65	0.4256	0.0012	0.0008	0.525	0.3972	0.0029	0.0023		2	0.2834
	CT753		No															0	0	0	0	0	0	0	0		-
	CT754 (icc)		No			a												1.175	0.5554	0.0013	0.0007	0.525	0.4151	0.0018	0.0014		0.36
	CT755 (groEL_3)		No			a	a	a				a		a				5.3167	1.6828	0.0035	0.0011	3.2	1.1781	0.0063	0.0023		0.815789
	CT756 (murF)		No			a	a	a				a	a					3.9333	1.255	0.0029	0.0009	3.4083	1.0699	0.0076	0.0024		2.57143	0.1276
	CT757 (mraY)		No															1.4167	0.7086	0.0014	0.0007	0	0	0	0		0
	CT758 (murD)		No			a	a	a				a	a	a				4.9167	1.486	0.0039	0.0012	2.65	1.123	0.0064	0.0026		0.576923
	CT759 (nlpD)		No			a		a				a		a				4.425	1.2375	0.006	0.0017	2.3833	0.9681	0.0098	0.0039		0.628205
	CT760 (ftsW)		No			a	a	a				a	a	a				10.0128	2.0766	0.0086	0.0018	2.3122	0.9983	0.006	0.0026		0.118421
	CT761 (murG)		No			a	a						a					2.4833	1.0126	0.0024	0.001	0.7667	0.5516	0.0022	0.0016		0.183333
	CT762 (murC/ddlA)		No			a	a	a				a	a	a				12.975	2.3206	0.0054	0.001	4.075	1.2654	0.0051	0.0015		0.225225
	CT763		No					a				a		a				1.4417	0.7243	0.0034	0.0017	0.9833	0.6175	0.0071	0.0044		1.03226	0.4929
	CT764		No					a										2.9303	0.986	0.0036	0.0012	0.6633	0.4123	0.0025	0.0015		0.106383
	CT765 (rsbV_2)		No			a	a	a										1.525	0.7288	0.0046	0.0022	0.5917	0.351	0.0054	0.0031		0.333333
	CT766 (miaA)		No			a		a										2.7333	0.9357	0.0027	0.0009	1.2833	0.5868	0.0038	0.0018		0.475
	CT767		No							a						a		1.5718	0.6469	0.0015	0.0006	0.6343	0.3683	0.0018	0.0011		0.28125
	CT768		No			a		a				a	a					6.3917	1.3968	0.0038	0.0008	3.6333	1.037	0.0065	0.0019		0.688889
	CT769 (ybeB)		No															0	0	0	0	0	0	0	0		-
	CT770 (fabF)		No			a	a	a				a						3.8333	1.2055	0.003	0.001	1.3833	0.7283	0.0033	0.0017		0.230769
	CT771		No			a		a				a	a	a				1.8667	0.8774	0.0041	0.002	1.4667	0.8221	0.0098	0.0055		1.69231	0.3176
	CT772 (ppa)		No				a											0.7833	0.5629	0.0012	0.0009	0	0	0	0		0
	CT773 (ldh)		No			a	a	a				a		a				3.5667	1.1095	0.0034	0.0011	1.9833	0.8434	0.0057	0.0025		0.5
	CT774 (cysQ)		No					a										4.175	1.3271	0.0041	0.0013	1.725	0.8572	0.005	0.0024		0.362319
	CT775		No			a						a						2.5917	0.9116	0.0034	0.0012	1.2083	0.5885	0.0048	0.0022		0.470588
	CT776 (aas)		No			a	a	a		a		a				a		4.5776	1.251	0.0028	0.0008	1.9637	0.8092	0.0037	0.0015		0.290323
	CT777 (bioF)		Yes (C/TW3)			a	a	a				a		a				5.8167	1.5581	0.0051	0.0014	2.2917	0.9403	0.0061	0.0024		0.291262
	CT778 (priA)		No			a		a				a						6.9681	1.7001	0.0031	0.0007	2.2772	0.9443	0.003	0.0012		0.225806
	CT779		No			a		a				a		a		a		3.7518	1.1515	0.0054	0.0017	2.6938	0.9792	0.0118	0.0042		1.20833	0.3856
	CT780		No			a						a						1.4833	0.7395	0.003	0.0014	1.1583	0.5993	0.0071	0.0035		1.03571	1
	CT781 (lysS)		No			a	a	a				a	a	a				3.875	1.2572	0.0025	0.0008	1.9583	0.8075	0.0037	0.0015		0.485714
	CT782 (cysS)		No			a		a				a						2.8333	1.0426	0.0019	0.0007	1.65	0.7366	0.0033	0.0015		0.5
	CT783		No			a						a						4.4746	1.183	0.0043	0.0011	2.1792	0.7871	0.0062	0.0023		0.410959
	CT784 (rnpA)		No			a				a		a				a		2.4107	0.8789	0.0066	0.0025	1.4485	0.6599	0.0121	0.0057		0.805556
	CT785 (rpmH)		No			a												0.6333	0.4524	0.0046	0.0032	0	0	0	0		0
	CT786 (rpmJ)		No															0	0	0	0	0	0	0	0		-
	CT787 (rpsN)		No					a						a				1.3	0.7352	0.0042	0.0024	0.4	0.4166	0.004	0.0039		0.25
	CT788
	CT789		No			a												0.65	0.4077	0.0037	0.0023	0.25	0.175	0.0045	0.0029		0.323077
	CT790		No			a						a						0.7583	0.4684	0.0015	0.0009	0.525	0.3949	0.0032	0.0025		1.23077	0.4484
	CT791 (uvrC)		No			a	a					a						4.9083	1.3977	0.0028	0.0008	2.275	0.9568	0.0039	0.0016		0.428571
	CT792 (mutS)		No			a						a						5.8167	1.2976	0.0024	0.0005	2.6917	0.9018	0.0033	0.0011		0.358974
	CT793 †		Yes (G/9301,G/9768,G/11074)			a		a				a		a				11.6463	2.2566	0.0515	0.0097	4.7415	1.3559	0.0633	0.0187		0.802721
	CT794 (dnaG)		No			a	a	a				a		a				5.8417	1.3821	0.0033	0.0008	3.2917	1.0804	0.0055	0.0018		0.675
	CT794.1		No			a						a						2.1083	0.9123	0.0076	0.0031	0.85	0.514	0.0092	0.0056		0.292208
	CT795		No			a												1.1583	0.6128	0.0024	0.0013	0.7583	0.4722	0.0047	0.0029		0.791667
	CT796 (glyQ)		No			a		a		a		a	a	a				11.762	2.584	0.0039	0.0009	6.5965	1.5898	0.0066	0.0016		0.62
	CT797 (pgsA_2)		No															1.6917	0.7146	0.0031	0.0013	0.5	0.4797	0.0027	0.0026		0.180328
	CT798 (glgA)		No			a				a		a						4.2914	1.321	0.003	0.0009	1.6645	0.7799	0.0035	0.0017		0.326923
	CT799 (ctc)		No									a						0.775	0.4292	0.0014	0.0008	0.525	0.4022	0.0028	0.0022		1.16667	0.4497
	CT800 (pth)		No															1.3083	0.4971	0.0024	0.0009	0.8583	0.3461	0.0048	0.0019		0.958333
	CT801 (rpsF)		No			a				a								0.8142	0.5265	0.0024	0.0016	0	0	0	0		0
	CT802 (rpsR)		No															0.65	0.4111	0.0026	0.0016	0	0	0	0		0
	CT803 (rplI)		No															0.325	0.3171	0.0006	0.0006	0.325	0.3108	0.0019	0.0019		-
	CT804 (ychB)		No			a	a	a				a	a	a		a		4.0348	1.3084	0.0047	0.0015	3.1771	1.0602	0.011	0.004		1.63636	0.2191
	CT805		No			a	a	a				a	a	a				3.8417	1.2365	0.0028	0.0009	1.8167	0.8147	0.004	0.0019		0.4
	CT806 (ptr)
	CT807 (plsB)		No			a	a	a				a	a	a		a		5.5457	1.4083	0.0056	0.0014	1.5965	0.7887	0.0048	0.0024		0.230769
	CT808 (cafE)		No			a		a				a						4.4499	1.398	0.0029	0.0009	1.3977	0.67	0.0027	0.0014		0.19697
	CT809		No			a	a	a					a					4.4736	1.3892	0.0143	0.0045	1.4186	0.8074	0.0138	0.0082		0.628205
	CT810 (rpmF)		No															0	0	0	0	0	0	0	0		-
	CT811 (plsX)		No			a	a			a						a		2.4717	0.885	0.0026	0.0009	0.8795	0.4733	0.0027	0.0014		0.270833
	CT812 (pmpD)		No			a	a	a				a	a	a				15.0123	2.0757	0.0033	0.0004	8.298	1.7355	0.0054	0.0011		0.675
	CT813		No			a		a				a		a				6.72	1.3859	0.0093	0.0019	6.1733	1.3079	0.0256	0.0056		5.59091	0.0012
	CT814		No															0	0	0	0	0	0	0	0		-
	CT814.1		No			a												1.775	0.8024	0.0049	0.0022	0.125	0.128	0.001	0.001		0.025641
	CT815 (glmM)		No			a	a	a				a		a				3.1083	1.1299	0.0023	0.0008	2.45	1.0026	0.0053	0.0022		1.625	0.2712
	CT816 (glmS)		No			a	a	a				a		a				7.2	1.6498	0.004	0.0009	4.1417	1.185	0.0068	0.0019		0.680851
	CT817 (tyrP_1)		No			a						a						2.7333	0.9689	0.0023	0.0008	1.6833	0.6979	0.0042	0.0018		0.76
	CT818 (tyrP_2)		No			a	a	a				a						7.4815	1.4917	0.0063	0.0013	3.4615	1.0659	0.0088	0.0027		0.522727
	CT819 (yccA)		No															0.375	0.2081	0.0005	0.0003	0	0	0	0		0
	CT820 (ftsY)		No					a				a						3.9083	1.0818	0.0046	0.0013	2.2833	0.8374	0.008	0.003		0.571429
	CT821 (sucC)		No			a						a						3.1167	1.0307	0.0027	0.0009	2.2083	0.7866	0.0057	0.002		1.22727	0.3815
	CT822 (sucD)		No			a		a						a				4.875	1.3345	0.0056	0.0015	2.25	1.0221	0.0077	0.0034		0.324324
	CT823 (htrA)		No			a		a				a						6.275	1.52	0.0042	0.001	2.9833	0.9511	0.006	0.002		0.441176
	CT824		No			a		a				a		a				6.975	1.5136	0.0024	0.0005	2.9	1.0672	0.003	0.0011		0.485714
	CT825		No			a		a				a						3.7383	1.0796	0.0029	0.0008	2.0347	0.891	0.0048	0.002		0.621622
	CT826 (pssA)		No			a			a						a			1.6081	0.8117	0.002	0.0011	0.508	0.492	0.0019	0.0019		0.205128
	CT827 (nrdA)		No			a		a				a		a				6.85	1.5518	0.0022	0.0005	4.55	1.2295	0.0043	0.0012		0.909091
	CT828 (nrdB)		No									a						1.8374	0.8849	0.0018	0.0009	0.9666	0.6496	0.0028	0.0019		0.583333
	CT829 (trmB)		No			a												0.4	0.3892	0.0006	0.0006	0	0	0	0		0
	CT830 (ytgB_2)		No			a						a						0.8	0.5187	0.0014	0.0009	0.8	0.5443	0.0041	0.0028		-
	CT831 (murB)		No									a						1.1083	0.658	0.0013	0.0008	0.525	0.4002	0.0018	0.0013		0.347826
	CT832 (nusB)		No			a						a						1.575	0.7499	0.0031	0.0014	1.05	0.6682	0.0062	0.0036		1.03333	0.4856
	CT833 (infC)		No			a		a		a		a		a		a		4.6502	1.3065	0.0088	0.0025	2.521	0.9077	0.0144	0.0054		0.818182
	CT834 (rpmI)		No					a										0.65	0.4265	0.0035	0.0022	0.25	0.174	0.0041	0.0027		0.33871
	CT835 (rplT)		No															1.75	0.7759	0.0047	0.0021	0.5833	0.4697	0.0047	0.0037		0.226804
	CT836 (pheS)		No			a		a		a		a		a		a		4.7271	1.5071	0.0046	0.0014	2.6546	1.0241	0.0078	0.0029		0.545455
	CT837		No			a		a		a		a						9.4993	2.0189	0.0048	0.001	5.2163	1.3306	0.0079	0.0021		0.666667
	CT838		No			a	a	a				a	a	a				4.425	1.3994	0.004	0.0013	1.5917	0.8333	0.0043	0.0022		0.273973
	CT839		No			a		a				a		a				3.8667	1.1842	0.0036	0.0011	1.3333	0.7393	0.0038	0.0021		0.217949
	CT840 (mesJ)		No			a						a						0.725	0.503	0.0008	0.0005	0.725	0.4886	0.0023	0.0016		-
	CT841 (ftsH)		No			a		a		a		a		a		a		6.7925	1.5924	0.0025	0.0006	3.5762	1.1356	0.0039	0.0013		0.463415
	CT842 (pnp)		No			a		a		a		a				a		10.3019	2.1	0.0049	0.001	4.7649	1.3238	0.0069	0.002		0.37931
	CT843 (rpsO)		No															0	0	0	0	0	0	0	0		-
	CT844 (yfhC)		No			a				a						a		1.5922	0.6883	0.0033	0.0013	0.8142	0.4008	0.005	0.0024		0.543478
	CT845		No							a						a		0.2612	0.2473	0.0012	0.0012	0.2612	0.2624	0.0036	0.0034		-
	CT846		No			a		a		a		a		a		a		3.5123	1.1036	0.005	0.0016	2.2656	0.9159	0.0097	0.0038		0.901961
	CT847		No			a	a	a				a	a	a				2.6417	1.0224	0.0051	0.002	2.1083	0.8927	0.0123	0.0051		2	0.2205
	CT848		No			a		a				a						2.6333	0.9648	0.0052	0.0019	1.2	0.6813	0.0071	0.0039		0.402439
	CT849		No				a	a		a			a			a		1.2511	0.6736	0.0026	0.0014	0.836	0.5688	0.0053	0.0036		0.92
	CT849.1		No					a										0.4	0.4024	0.0021	0.0021	0	0	0	0		0
	CT850		No			a	a	a		a		a	a	a		a		2.9155	1.0195	0.0024	0.0008	1.6659	0.7297	0.0041	0.0018		0.542857
	CT851 (map)		No					a						a				2.4333	0.906	0.0028	0.001	1.2	0.668	0.0041	0.0023		0.387755
	CT852 (yhgN) †		No			a	a	a		a		a	a	a		a		17.0633	2.6054	0.0277	0.0042	6.721	1.6632	0.0329	0.0077		0.425532
	CT853		No			a		a		a		a	a	a		a		5.5167	1.4753	0.0092	0.0025	1.328	0.7122	0.0067	0.0037		0.146667
	CT854		No			a		a		a		a		a		a		8.2409	1.8074	0.0047	0.001	5.4659	1.3535	0.0093	0.0025		0.882353
	CT855 (fumC)
	CT856 (ychM)		No			a		a				a		a				4.0667	1.1427	0.0024	0.0007	2.1083	0.8671	0.0037	0.0015		0.395349
	CT857		No			a		a				a	a	a				5.8215	1.572	0.0046	0.0012	2.6313	0.9867	0.0063	0.0023		0.379747
	CT858 (CPAF)		No			a		a				a						2.4706	0.9584	0.0014	0.0005	0.6765	0.4472	0.0011	0.0007		0.214286
	CT859 (ispH)		No			a				a		a				a		4.7939	1.3178	0.0052	0.0015	2.148	1.0654	0.007	0.0034		0.528571
	CT860		No			a				a		a				a		7.9681	1.8684	0.0054	0.0012	4.8273	1.3508	0.0098	0.0028		0.83871
	CT861		No			a						a						8.8677	1.7852	0.0058	0.0012	5.2831	1.3915	0.0104	0.0028		0.6375
	CT862 (lcrH_2)		No			a						a						2.8205	0.949	0.0054	0.0018	0.8205	0.5701	0.0048	0.0035		0.155172
	CT863		No			a						a						5.2083	1.3494	0.0036	0.0009	2.6667	0.8189	0.0055	0.0017		0.529412
	CT864 (xerD)		No			a				a		a				a		3.5007	1.1413	0.0039	0.0013	1.2598	0.5831	0.0042	0.0019		0.295775
	CT865		No							a								2.4165	0.8769	0.0024	0.0009	2.0798	0.8166	0.0063	0.0025		3.44444	0.0551
	CT866 (glgB)		No															5.9706	1.7086	0.0027	0.0008	3.1176	1.0525	0.0042	0.0014		0.555556
	CT867		Yes (D(s)/2932, D/SotonD1, F/SW4)			a												8.9218	2.0403	0.0087	0.002	7.318	1.7231	0.0216	0.0051		3.82759	0.0074
	CT868		No															18.3651	2.2235	0.015	0.0018	14.3095	1.9977	0.0353	0.0049		2.34211	0.0007
	CT869 (pmpE)		No			a				a		a				a		68.6931	5.1289	0.0238	0.0017	26.632	2.9273	0.0278	0.0031		0.298
	CT870 (pmpF)		No		a	a			a	a	a	a			a	a		214.273	8.9218	0.0691	0.0028	72.4093	4.9832	0.0702	0.0048		0.258546
	CT871 (pmpG)		No			a						a						28.248	3.1758	0.0093	0.001	12.4819	2.1172	0.0123	0.0021		0.421053
	CT872 (pmpH)		No		a	a			a	a	a	a			a	a		109.046	6.6461	0.0361	0.0022	30.1865	3.4992	0.03	0.0034		0.170968
	CT873
	CT874 (pmpI)		Yes (A/7249)			a				a		a				a		14.0935	2.4386	0.0053	0.0009	5.7195	1.3222	0.0065	0.0016		0.351064
	CT875		No			a				a		a				a		19.0319	2.6217	0.0107	0.0014	15.9768	2.5677	0.0271	0.0044		3	0.0008
	† - Genes highly variable due to frameshift event(s) and hence were not considered as truly polymorphic. The segregation pattern observed from phylogenetic analyses were also influenced by the frameshift event(s).
	# - Strain(s) with probable annotation issues or pseudogenes.
